# Supplementary material for: Synthesis of a new class of pyrazole embedded spirocyclic scaffolds using magnetically separable Fe3O4@SiO2–SO3H nanoparticles as recyclable solid acid support
Source: Royal Society of Chemistry journal article supplement (doi:10.1039/c5ra23599e), 2015-01-01
Supplement: c5ra23599e1.pdf [file c5ra23599e1.pdf]

## Supplementary Information

### Synthesis of a new class of pyrazole embedded spirocyclic scaffolds using magnetically separable $\text{Fe}_3\text{O}_4@\text{SiO}_2\text{-SO}_3\text{H}$ nanoparticles as recyclable solid acid support

Ashis Kundu, Sayan Mukherjee and Animesh Pramanik\*

*Department of Chemistry, University of Calcutta, 92, A. P. C. Road, Kolkata-700 009, India;*  
Fax: +91-33-2351-9755; Tel: +91-33-2484-1647.

E-mail: animesh\_in2001@yahoo.co.in

---

#### Contents:

- A. Copies of  $^1\text{H}$  and  $^{13}\text{C}$  NMR Spectra ----- S2-S21
- B. IR spectrum of the catalyst ----- S22-S23

B. Copies of  $^1\text{H}$  and  $^{13}\text{C}$  NMR Spectra of synthesized compounds:

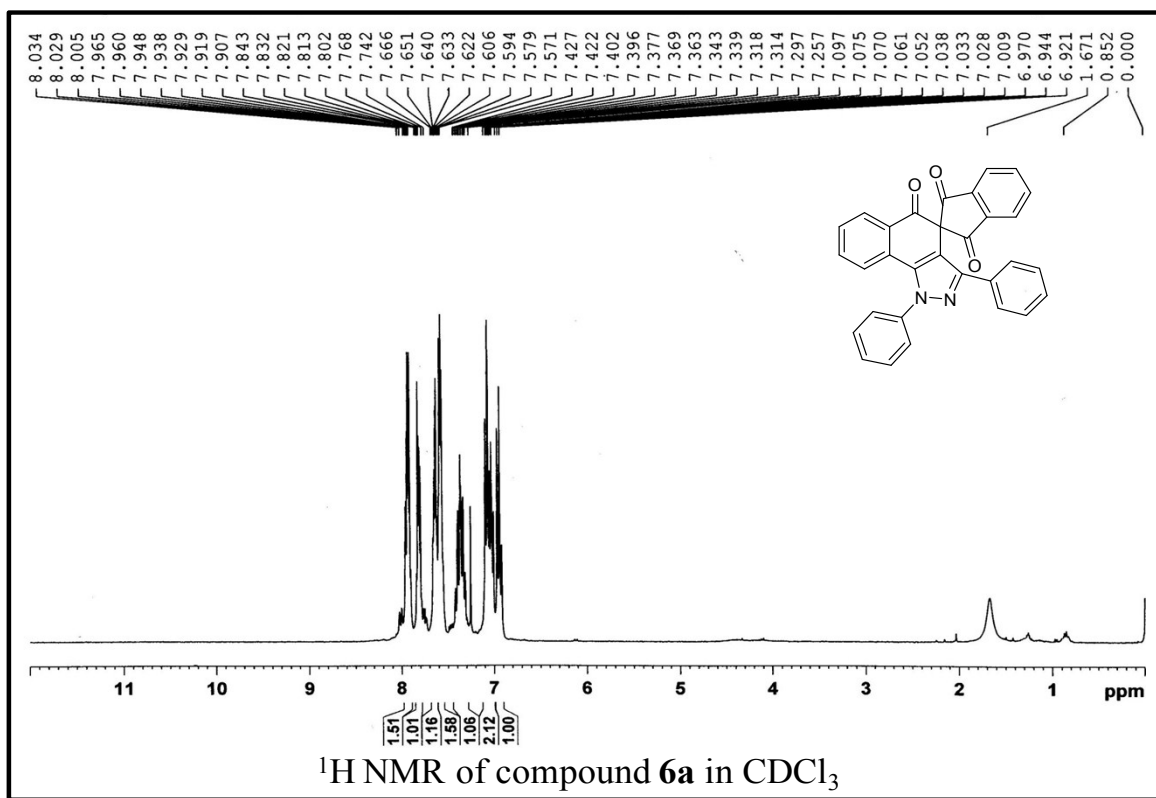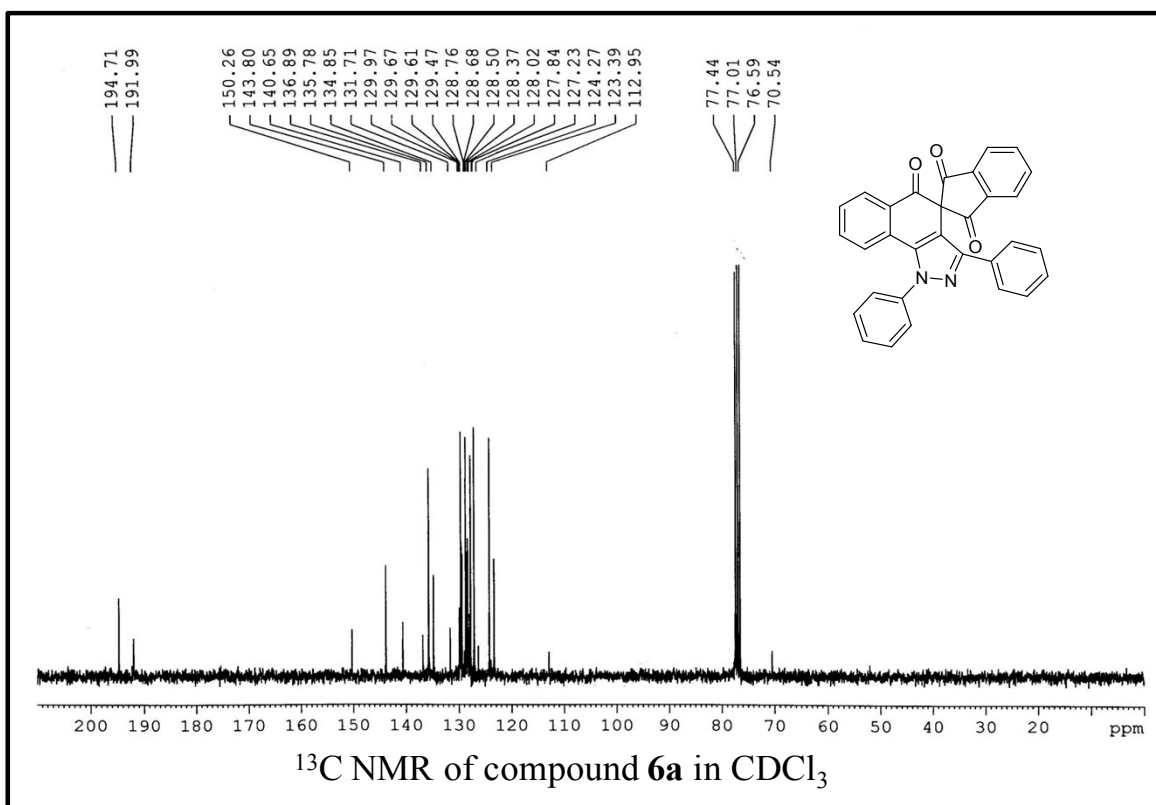

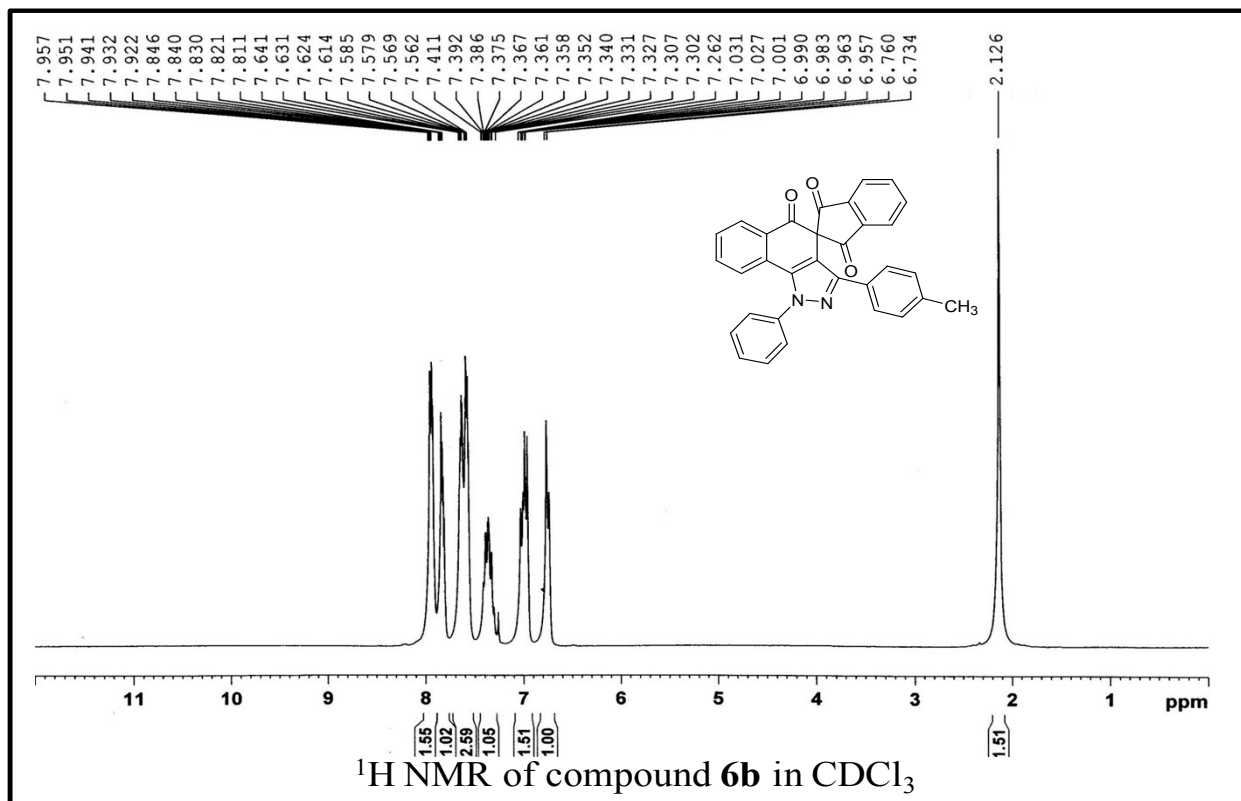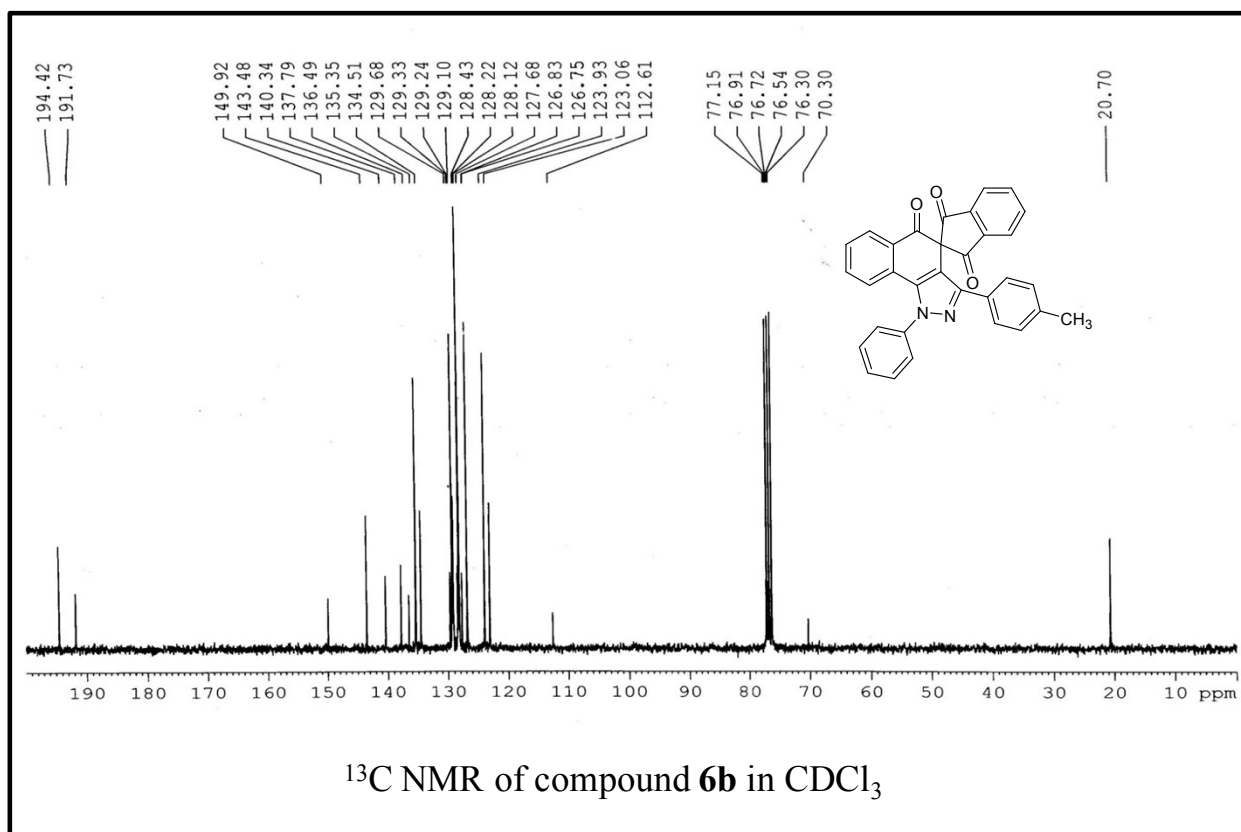

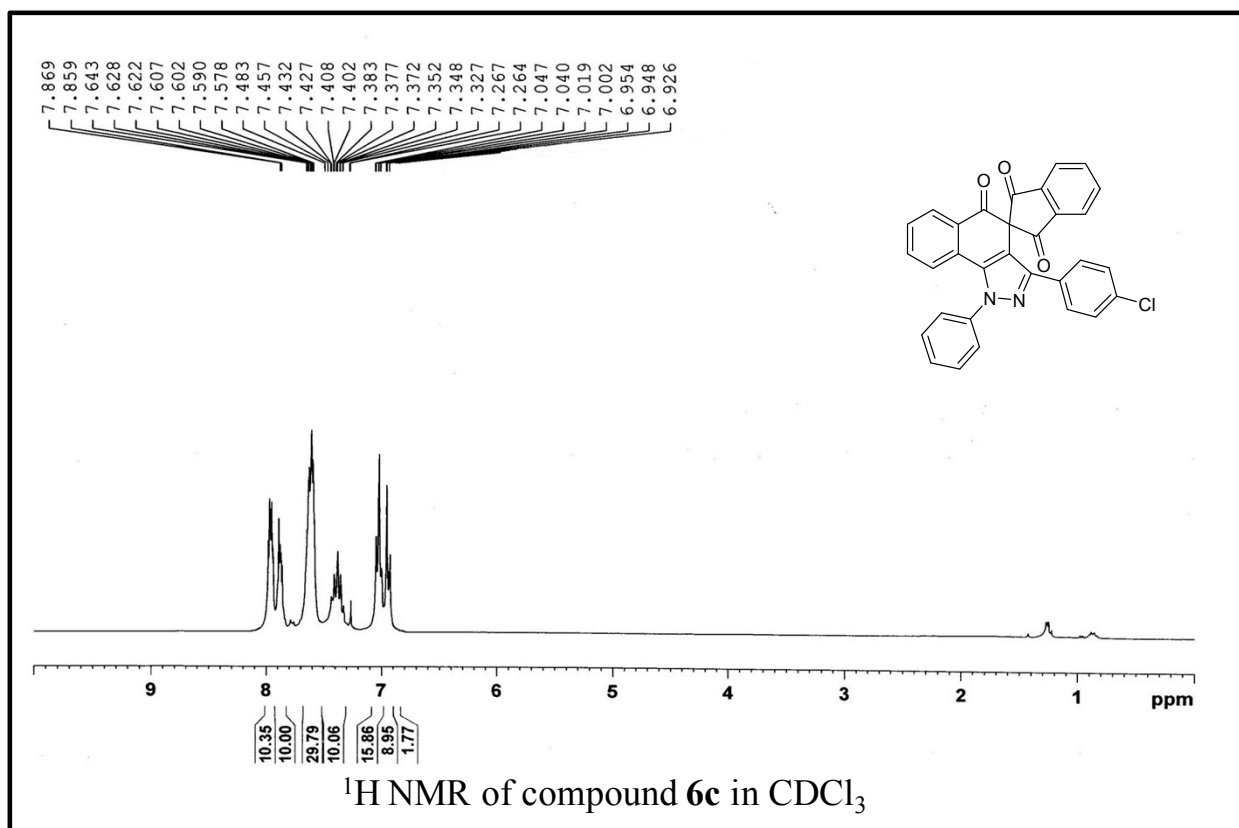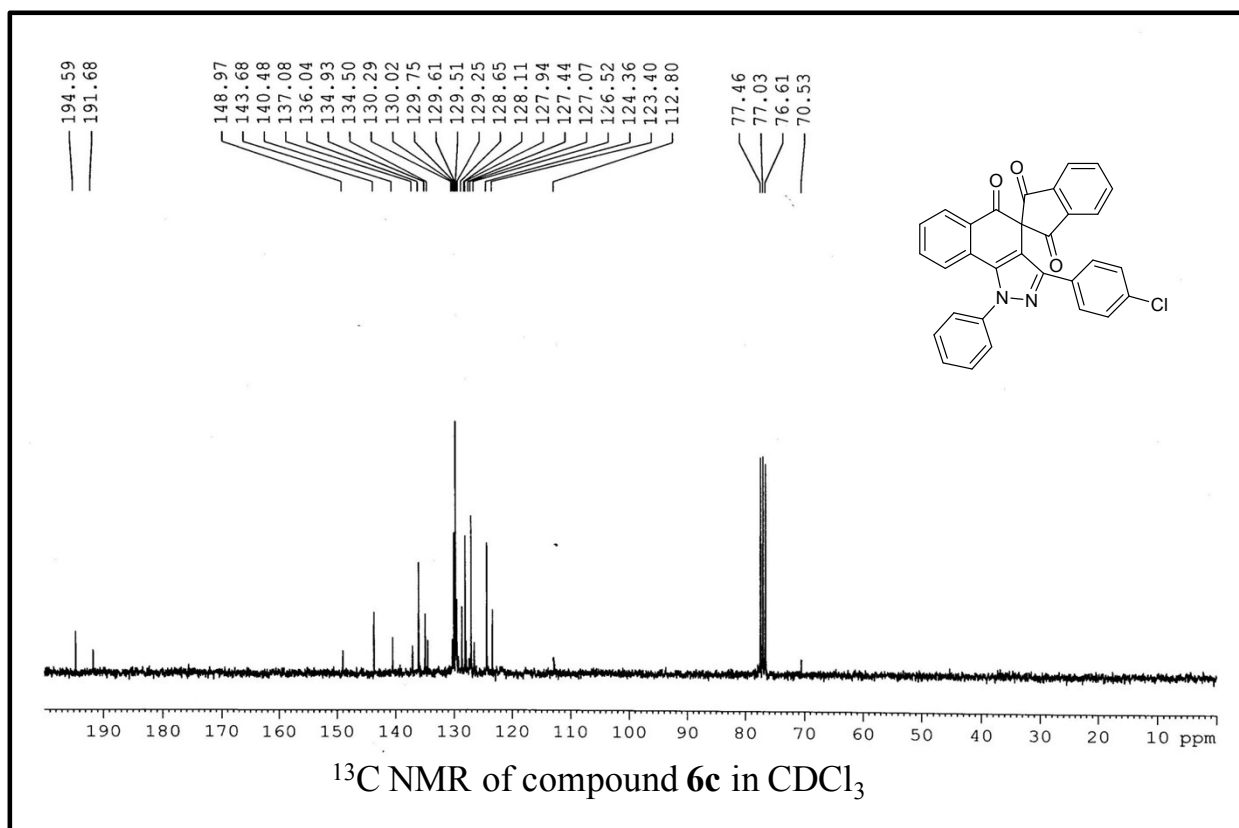

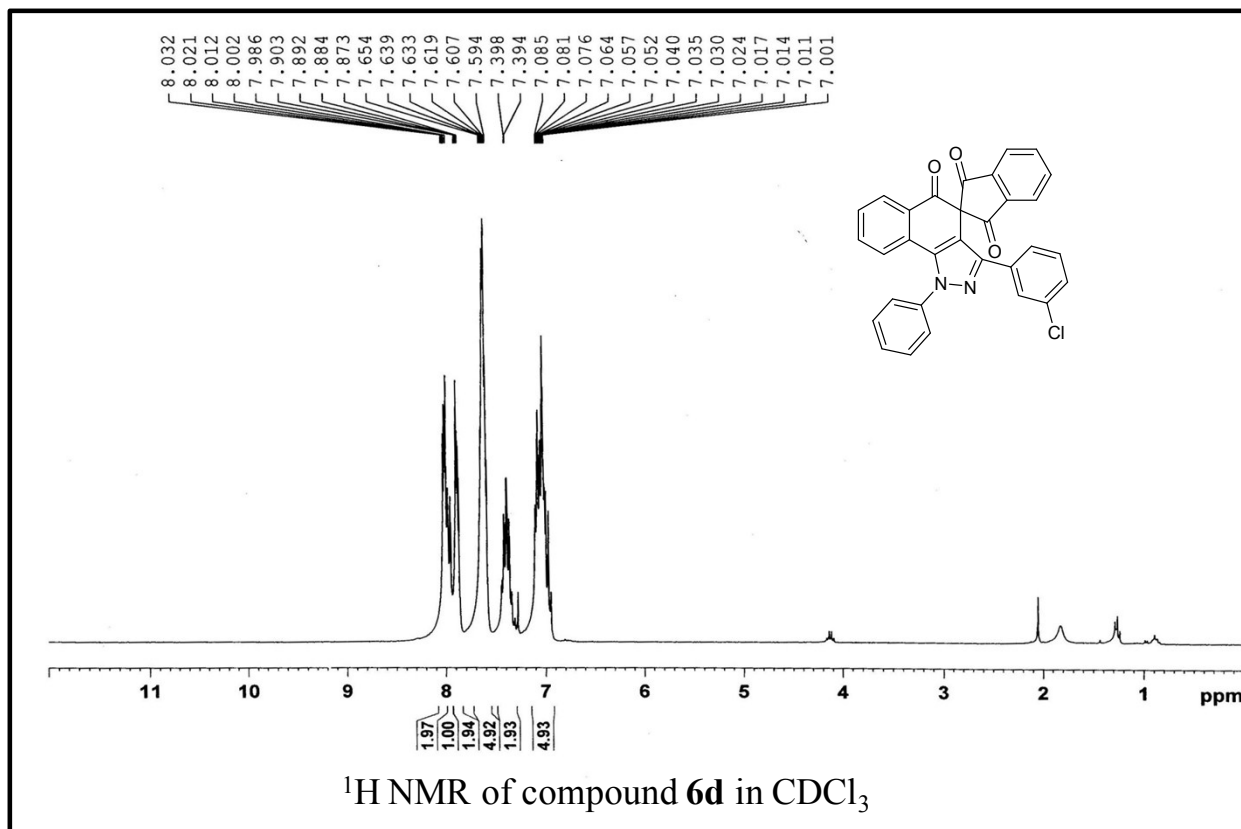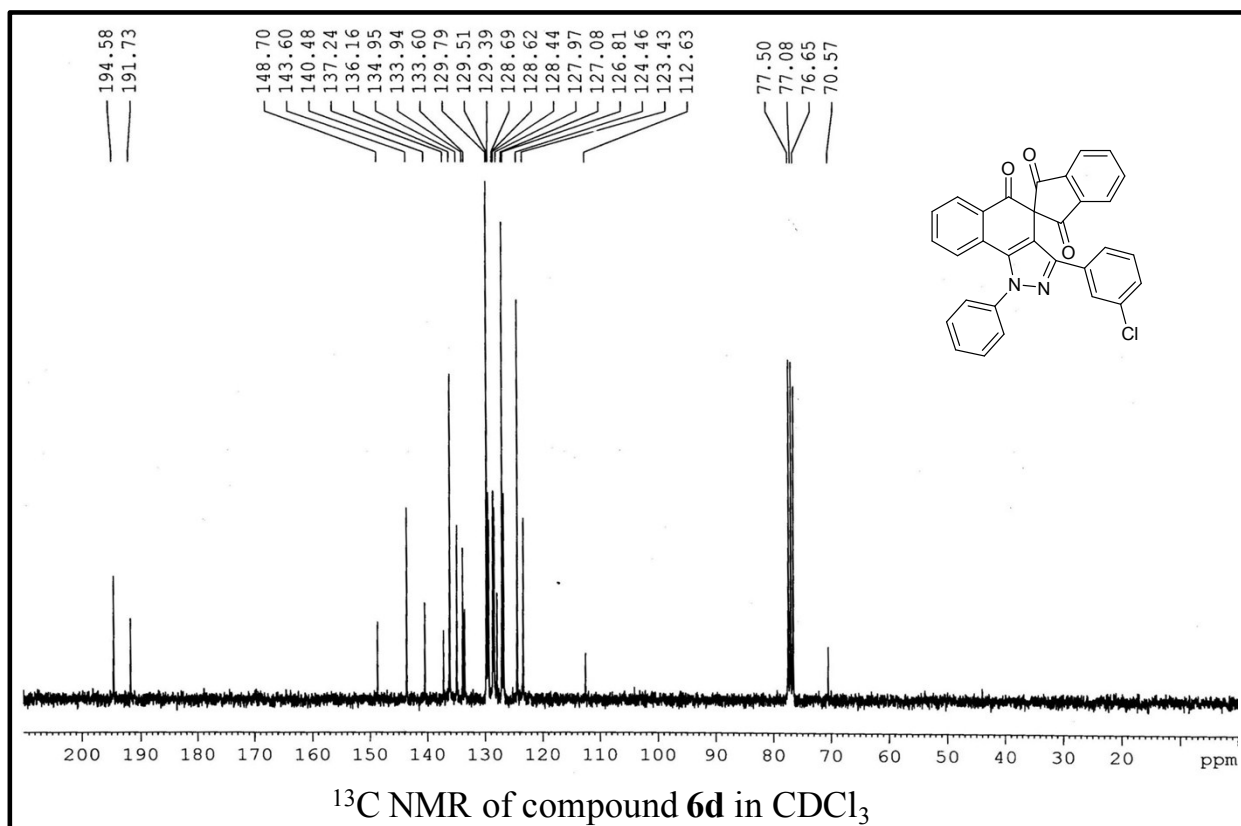

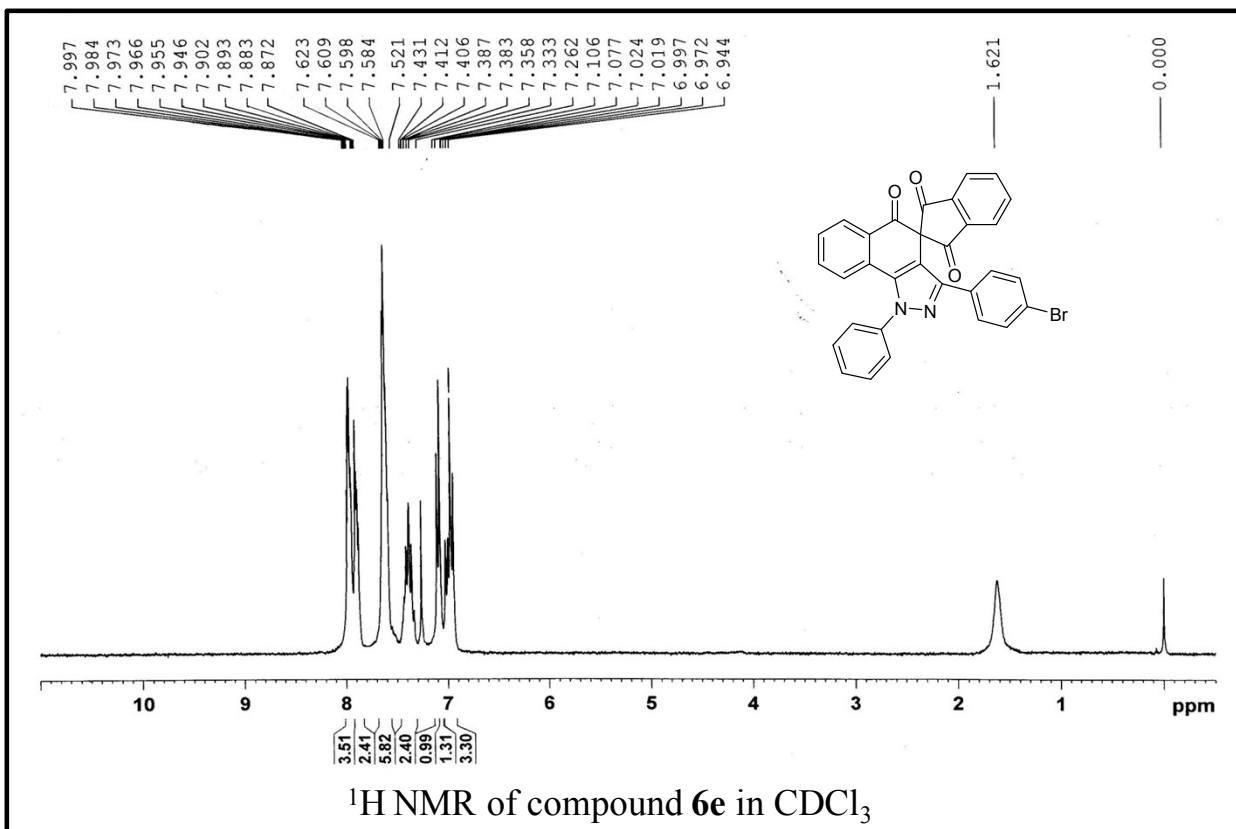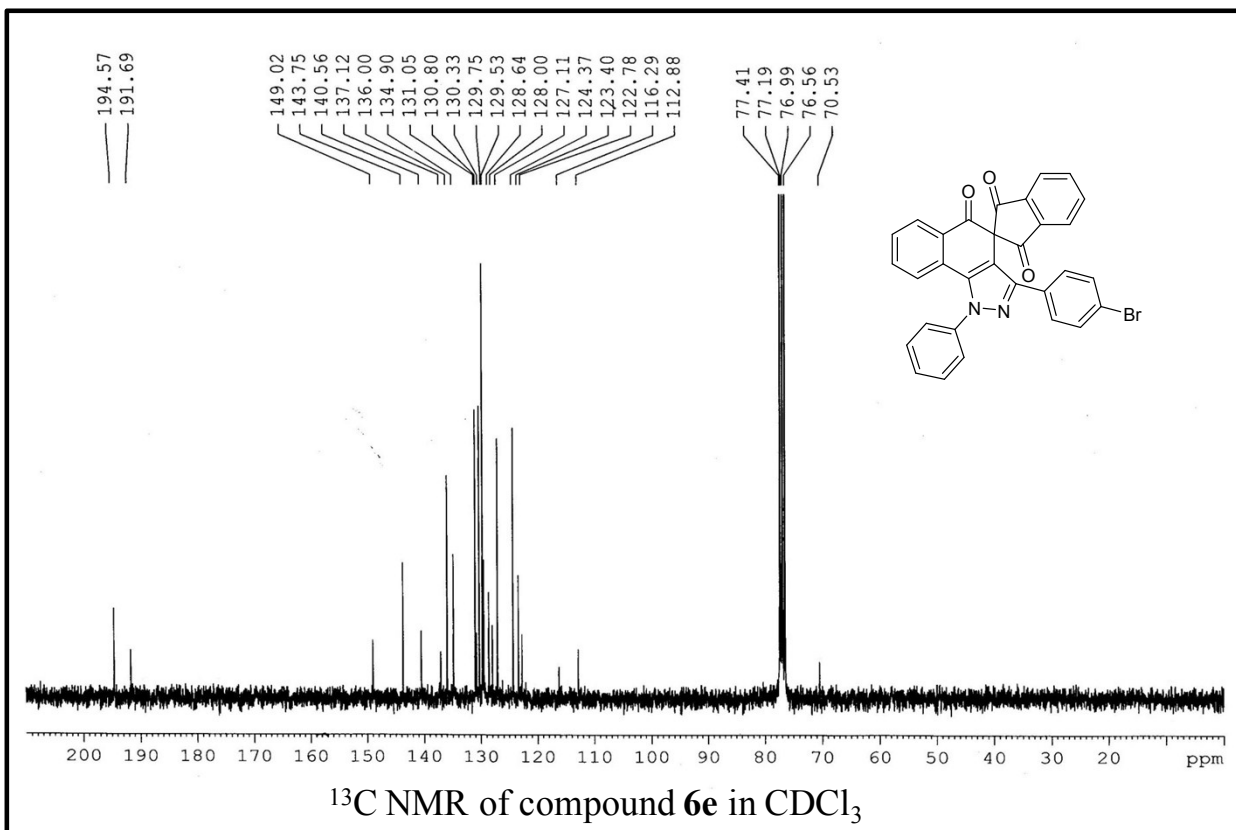

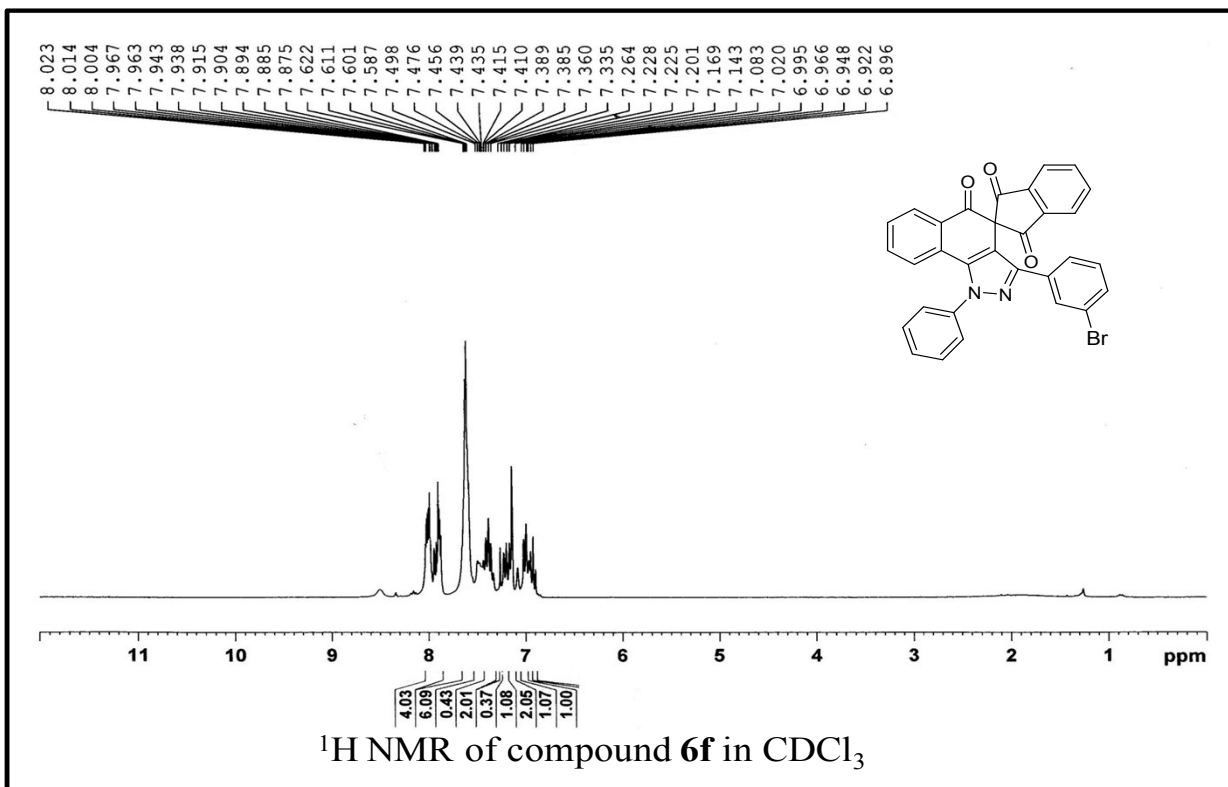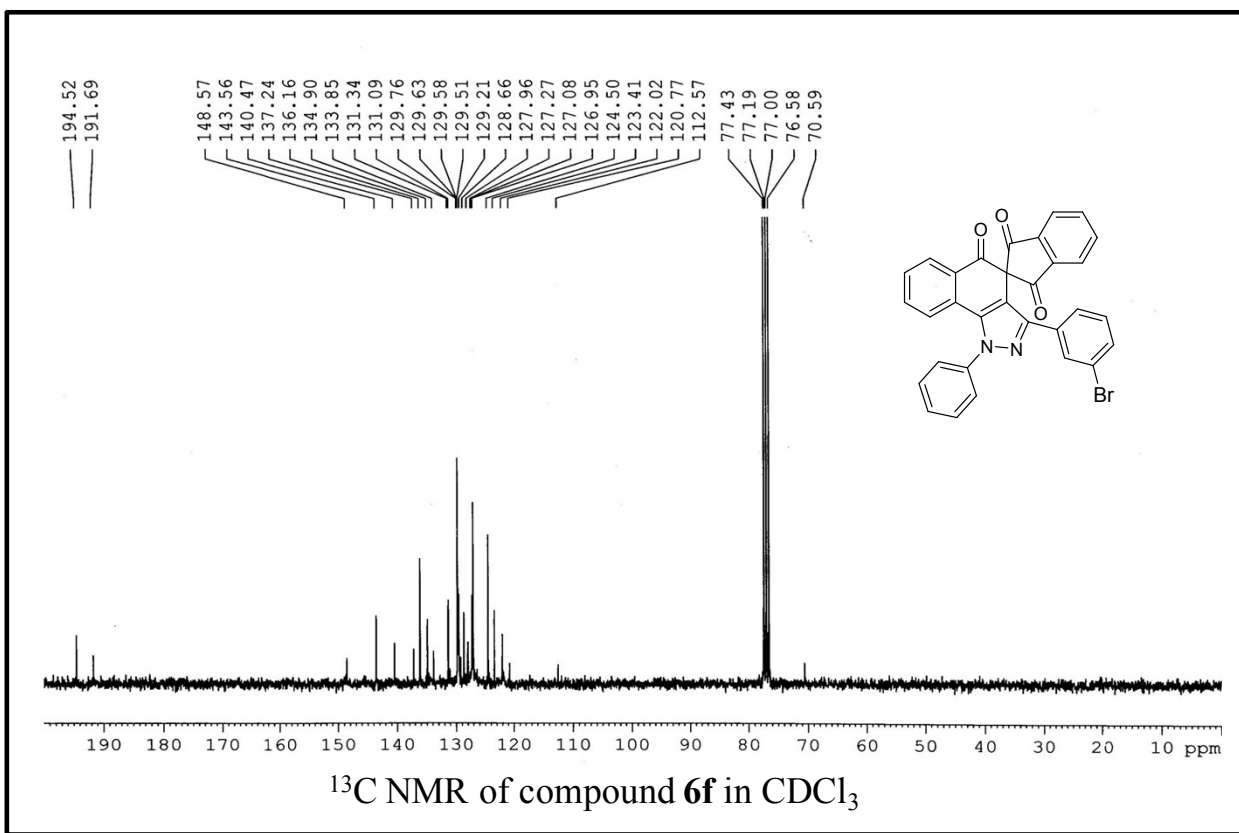

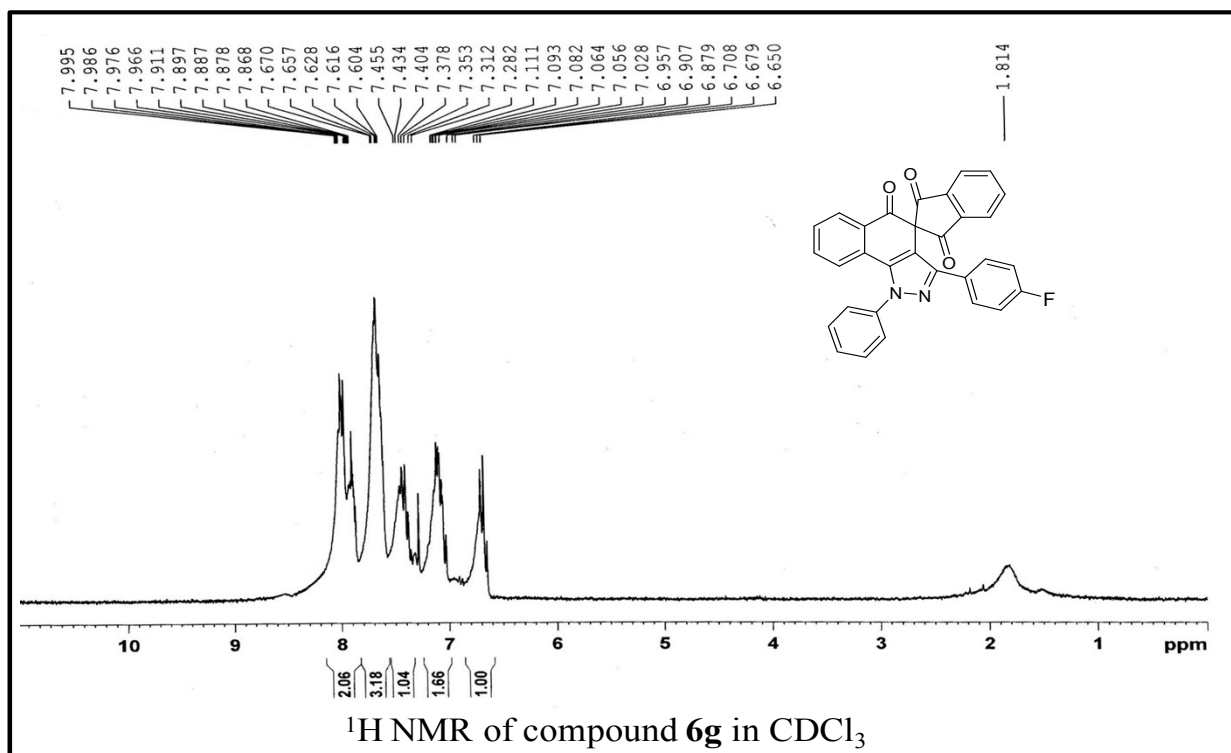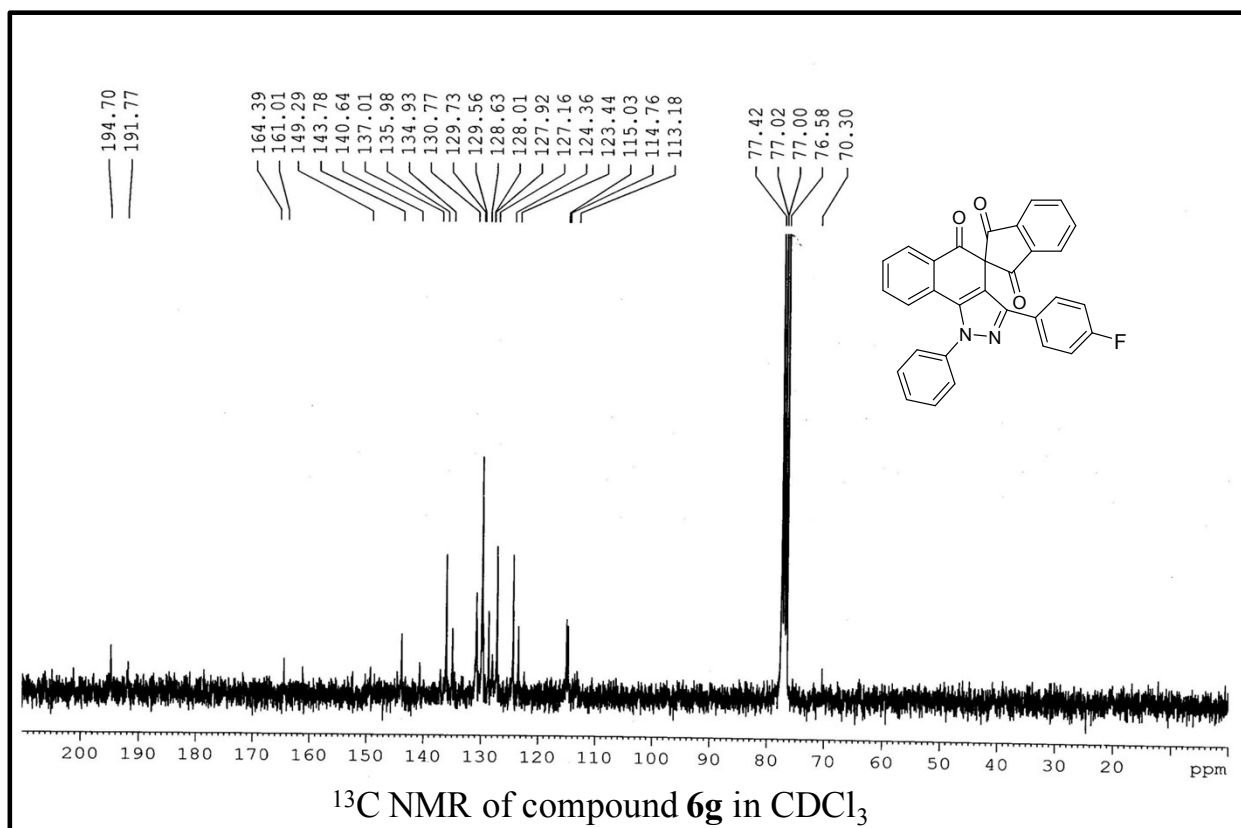



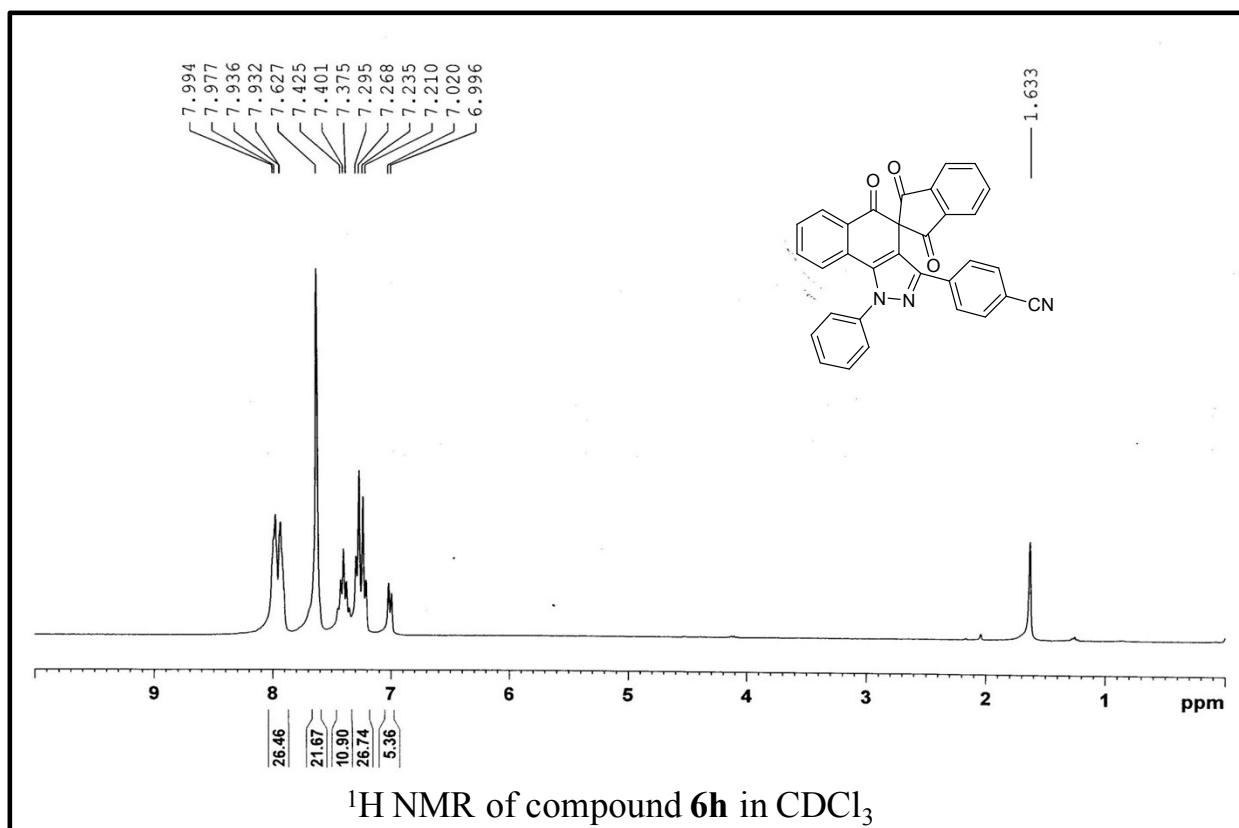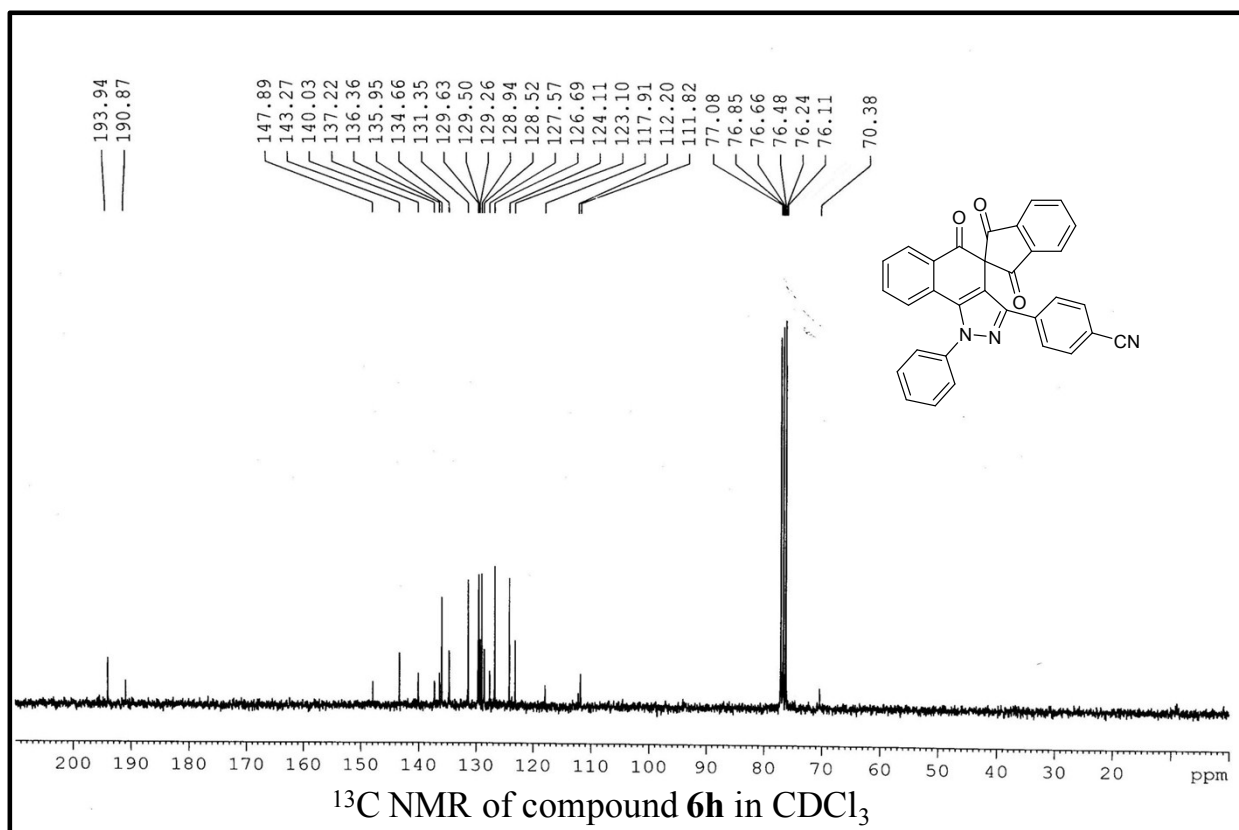

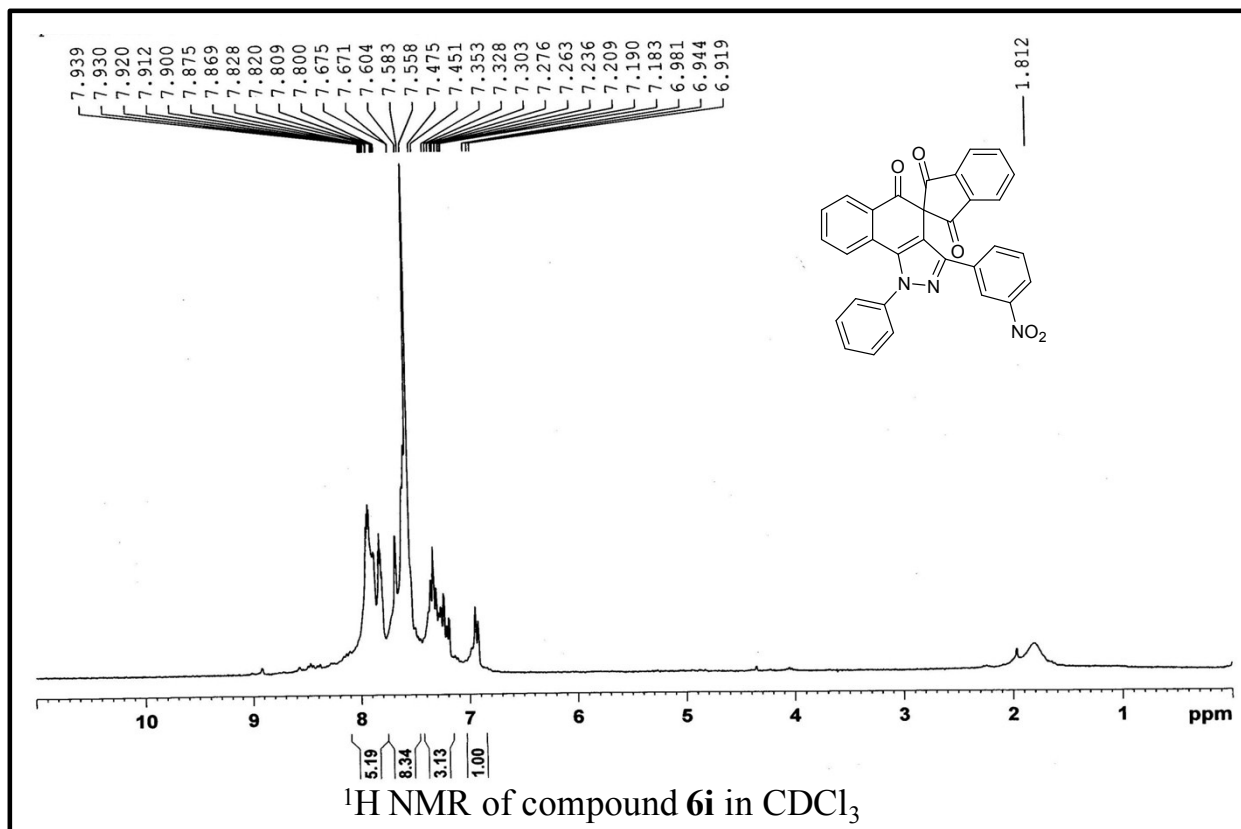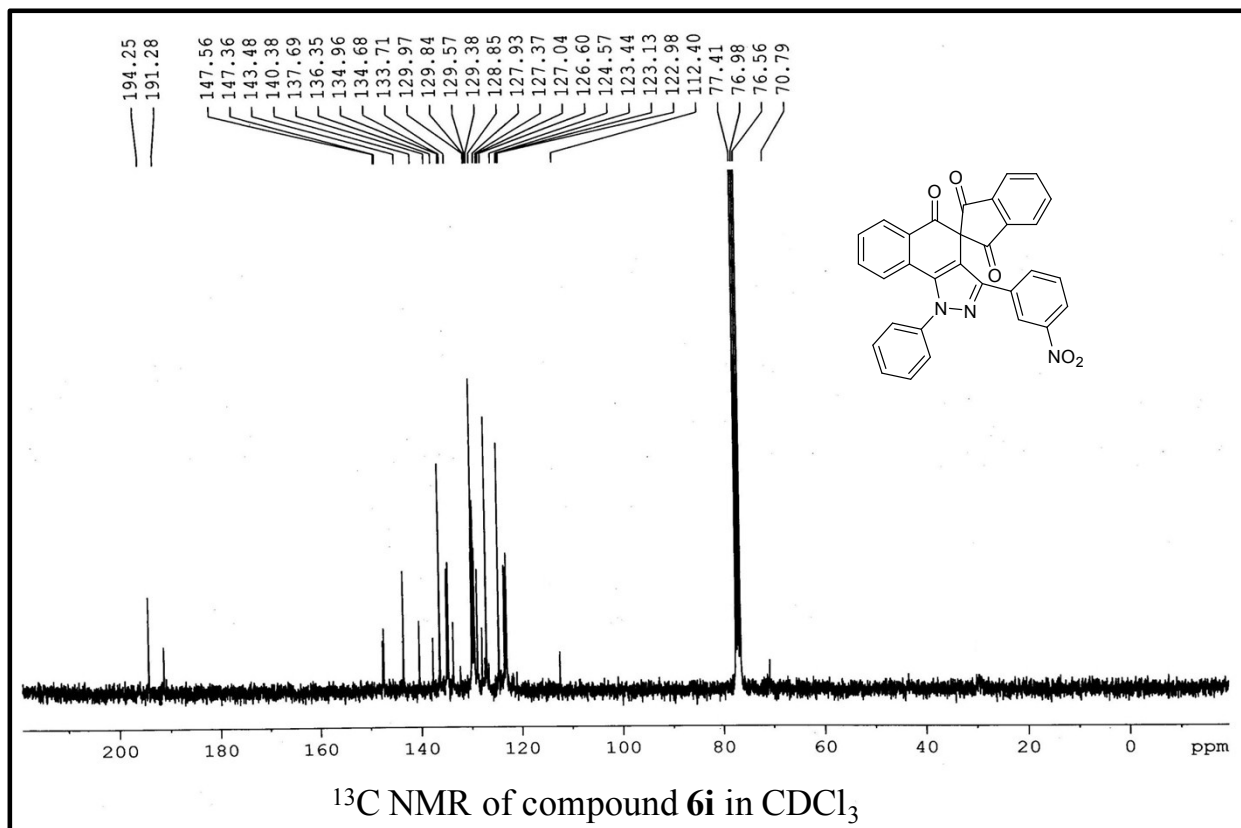

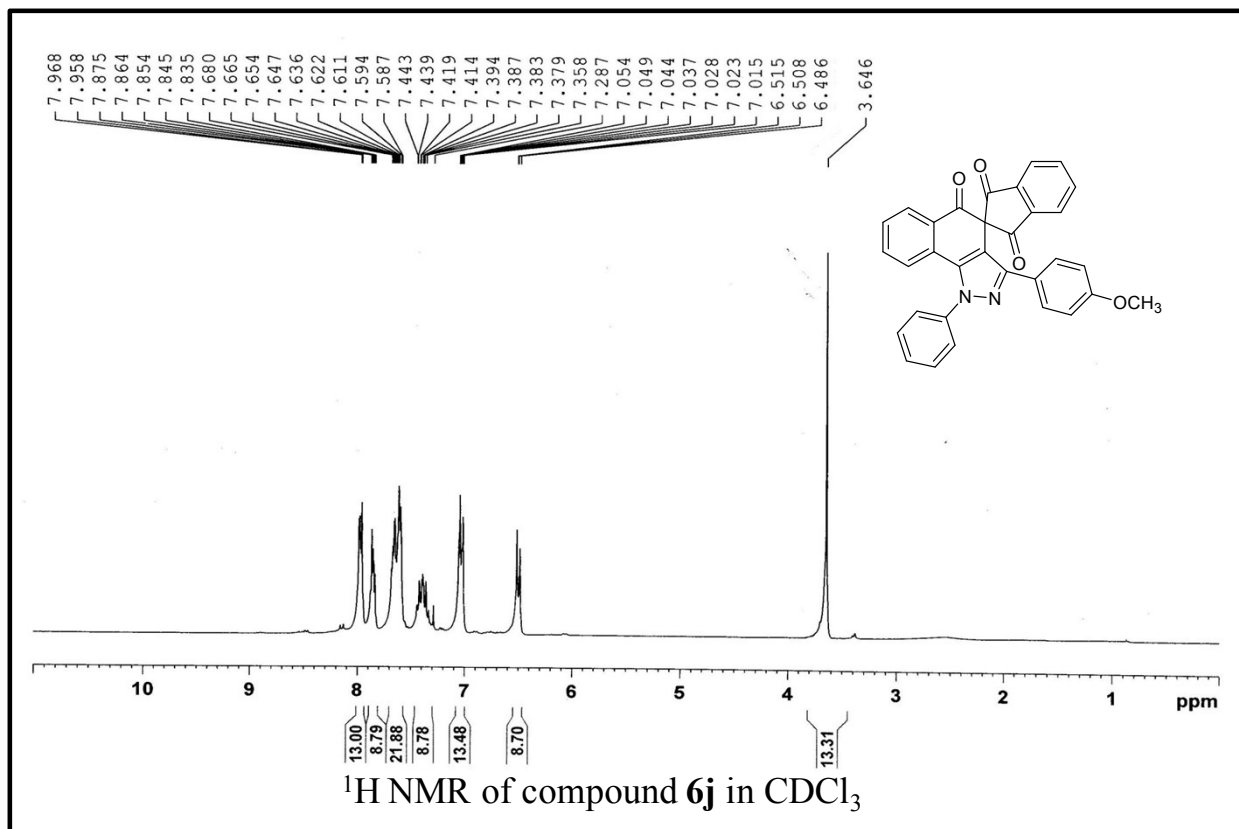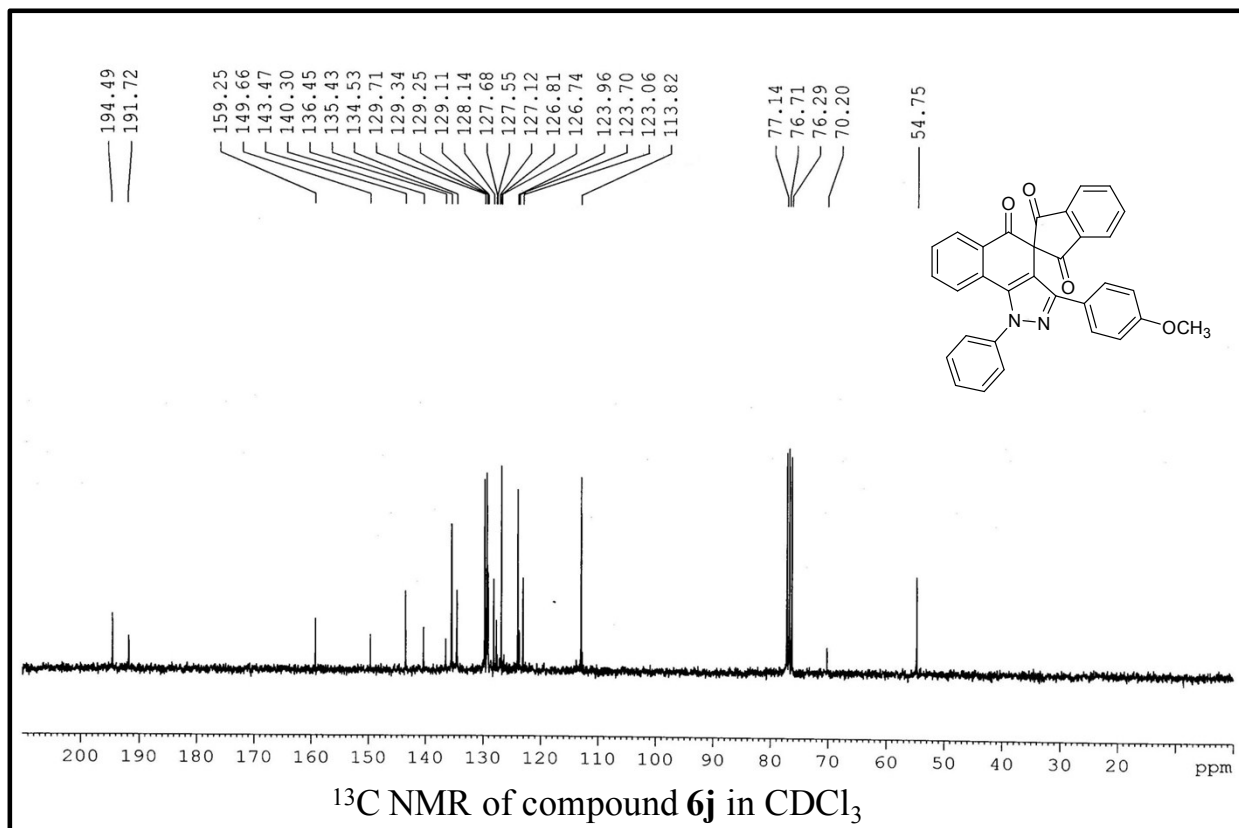

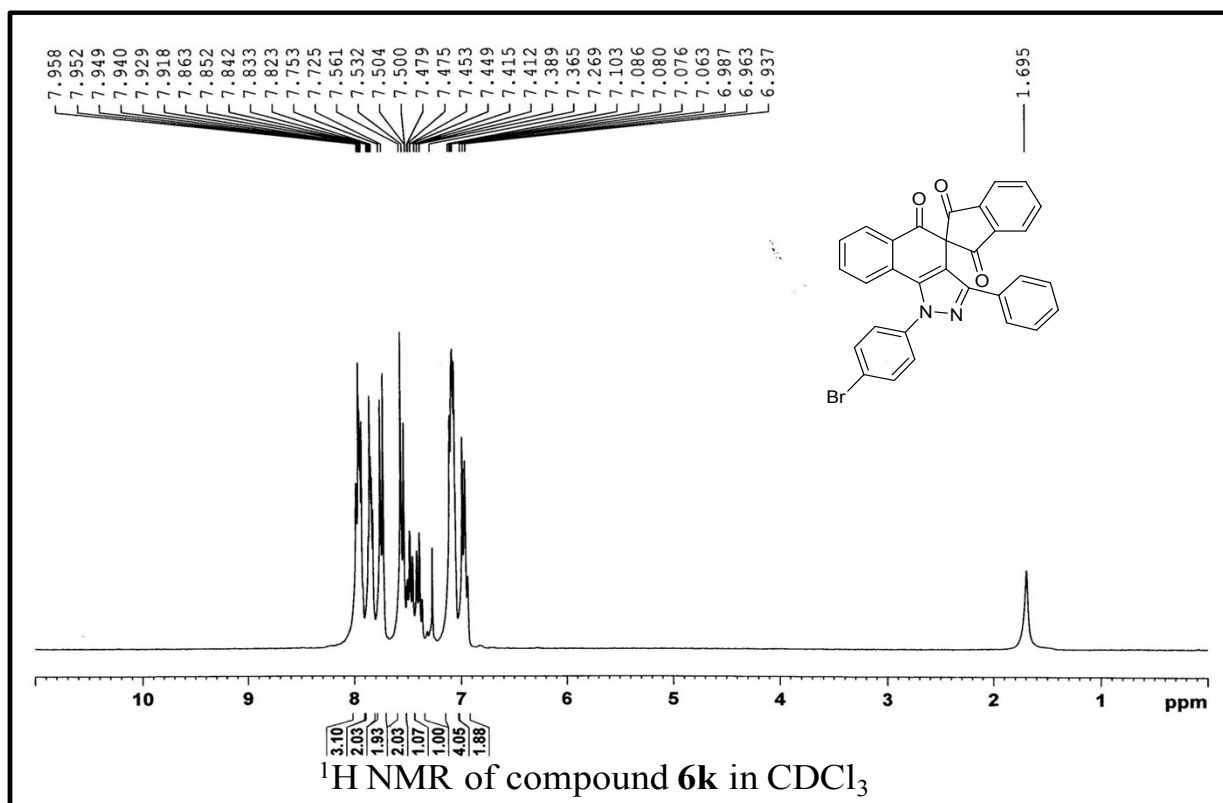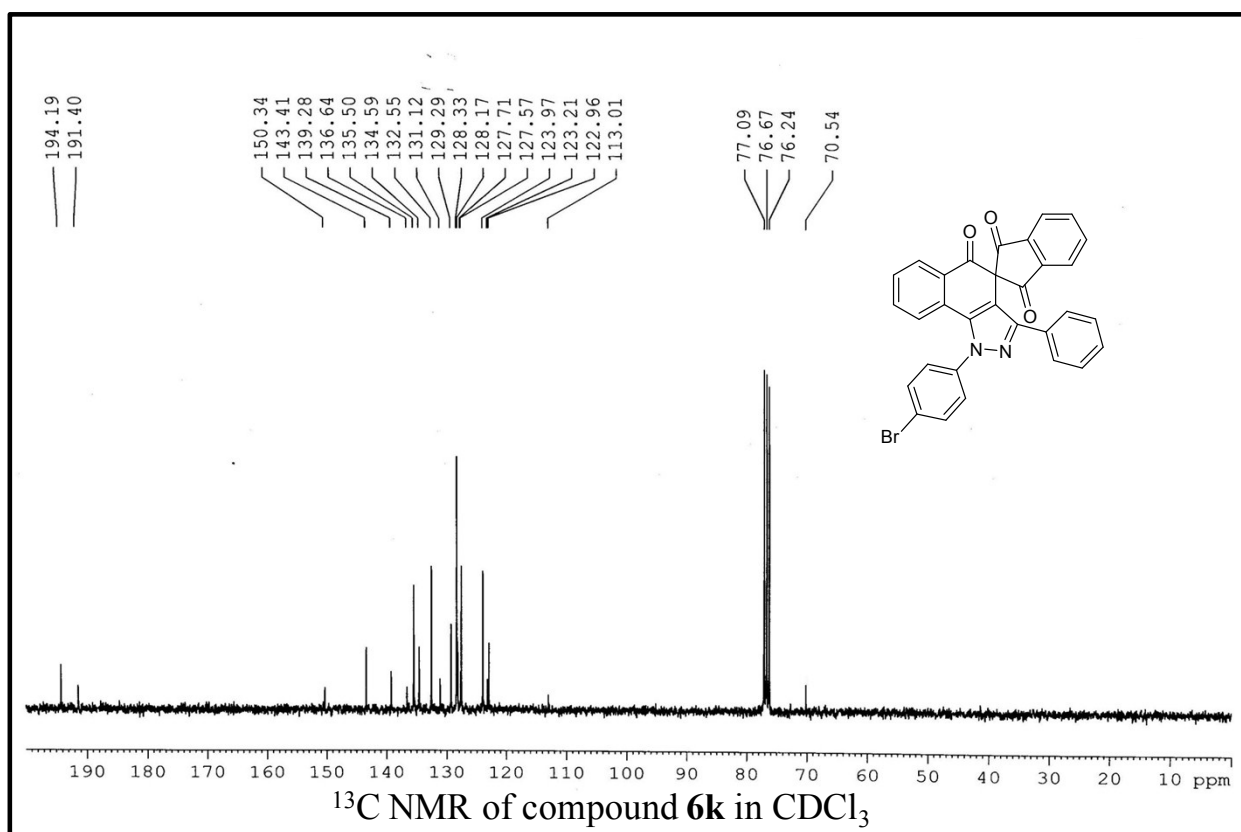

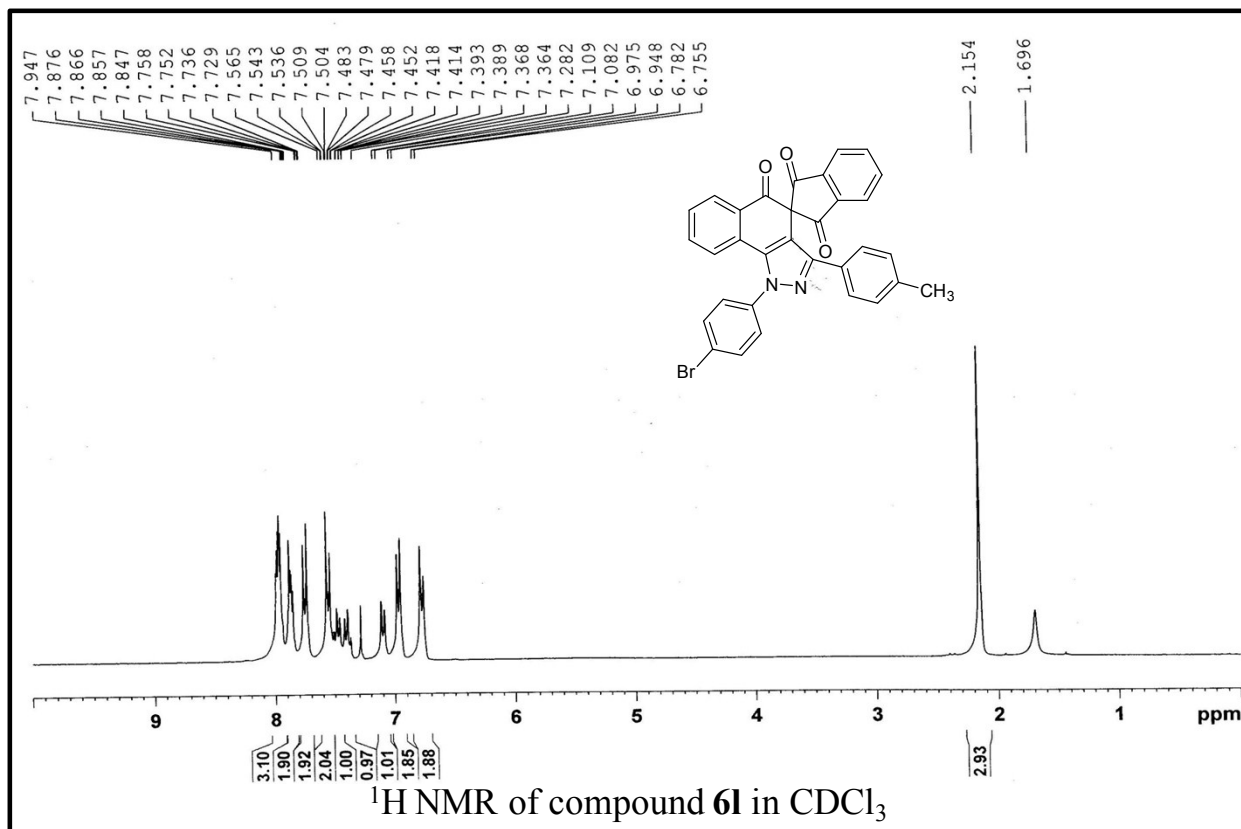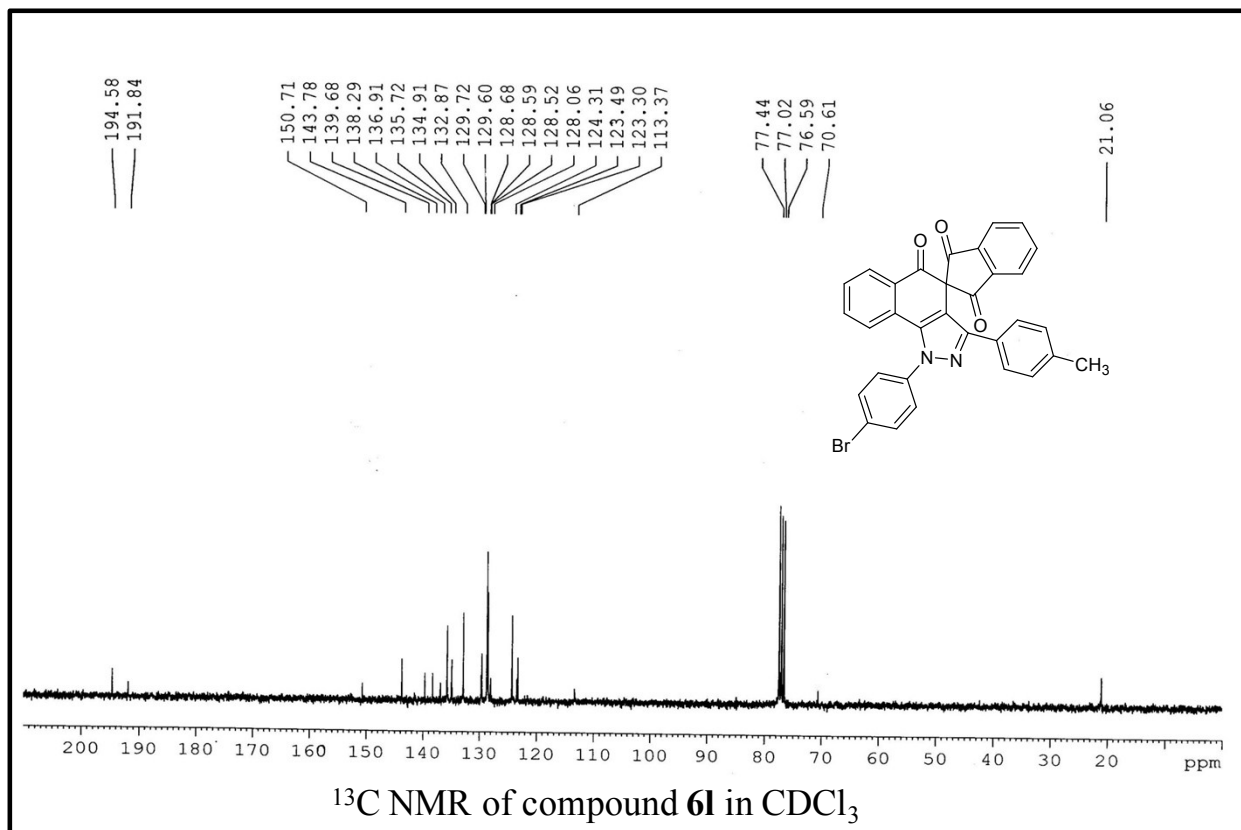

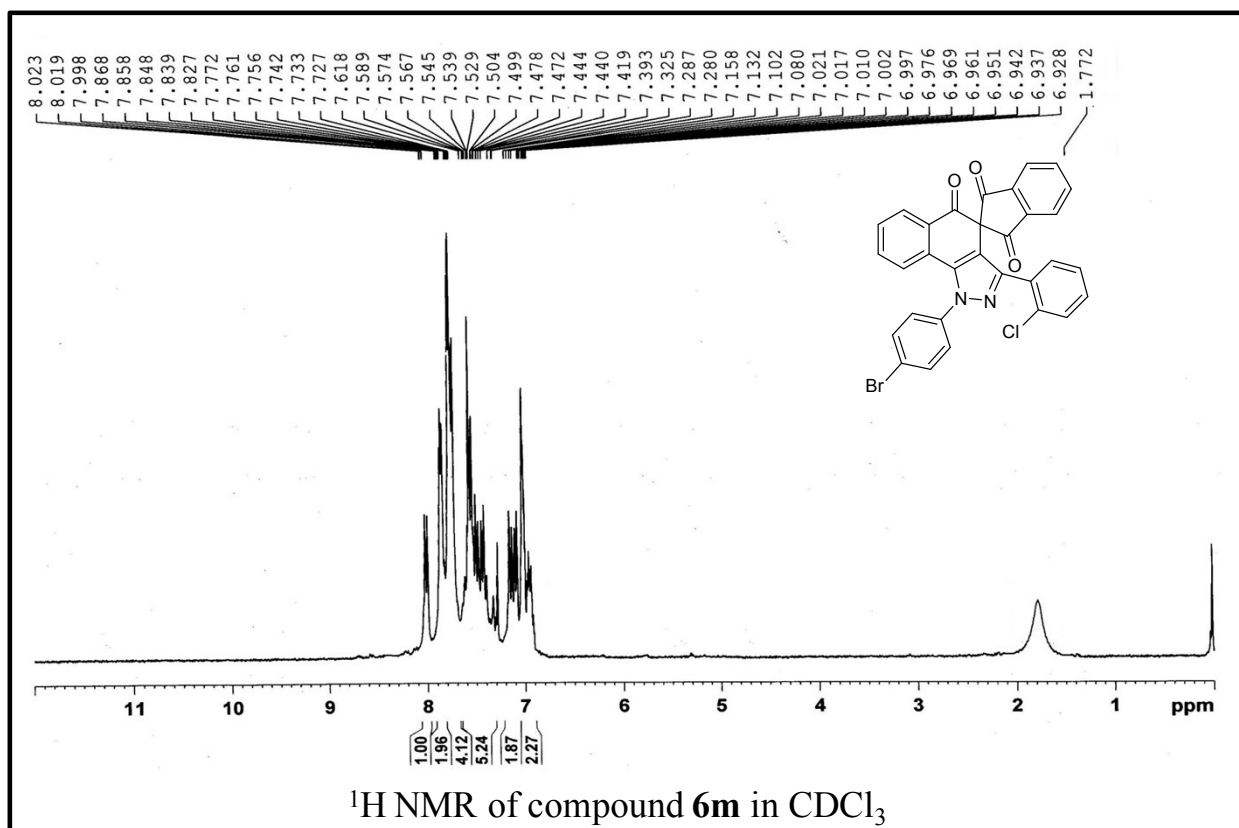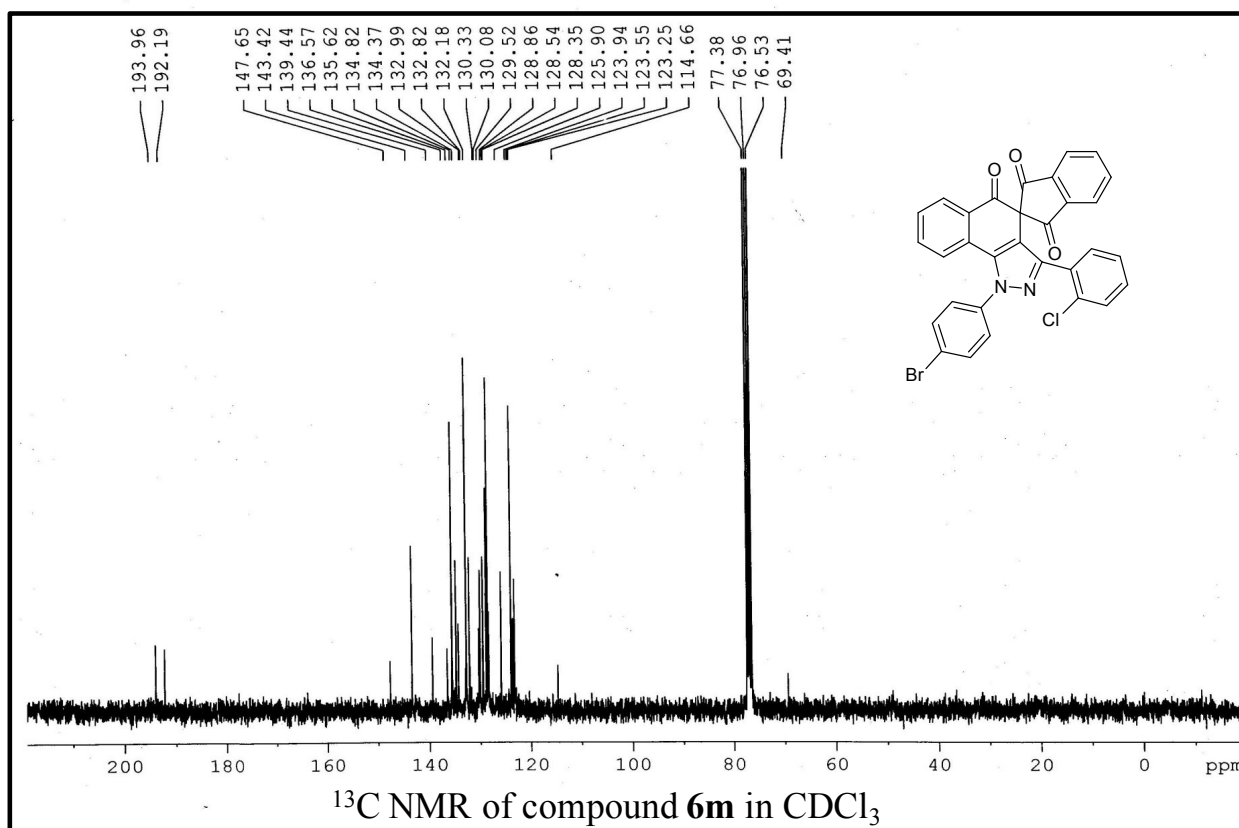

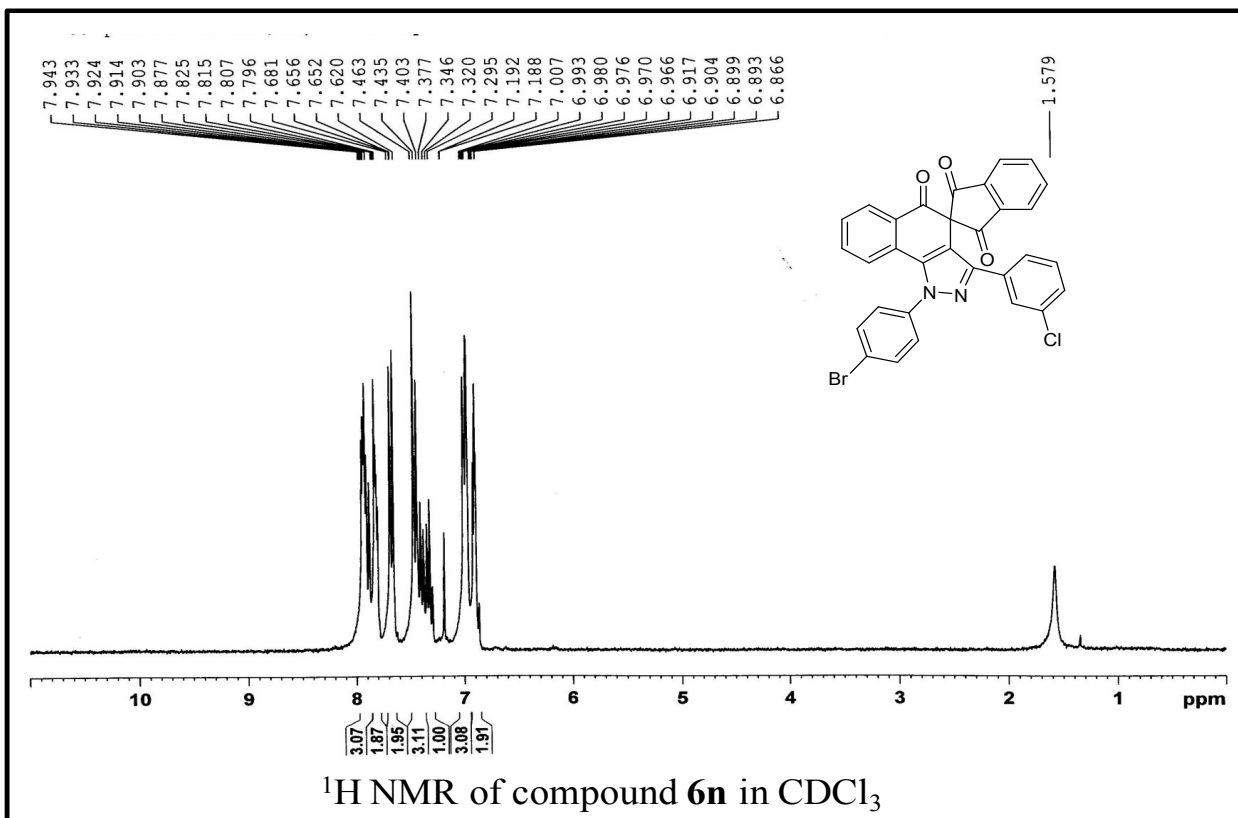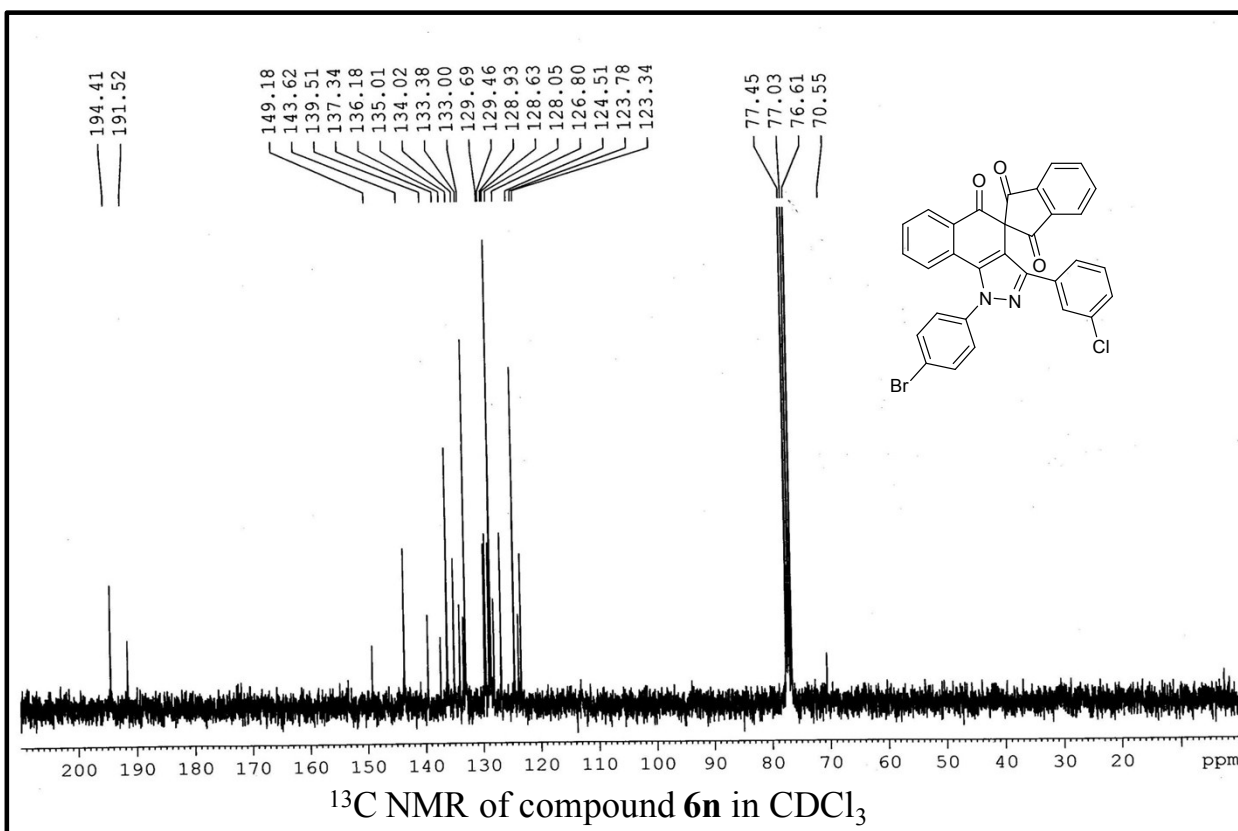

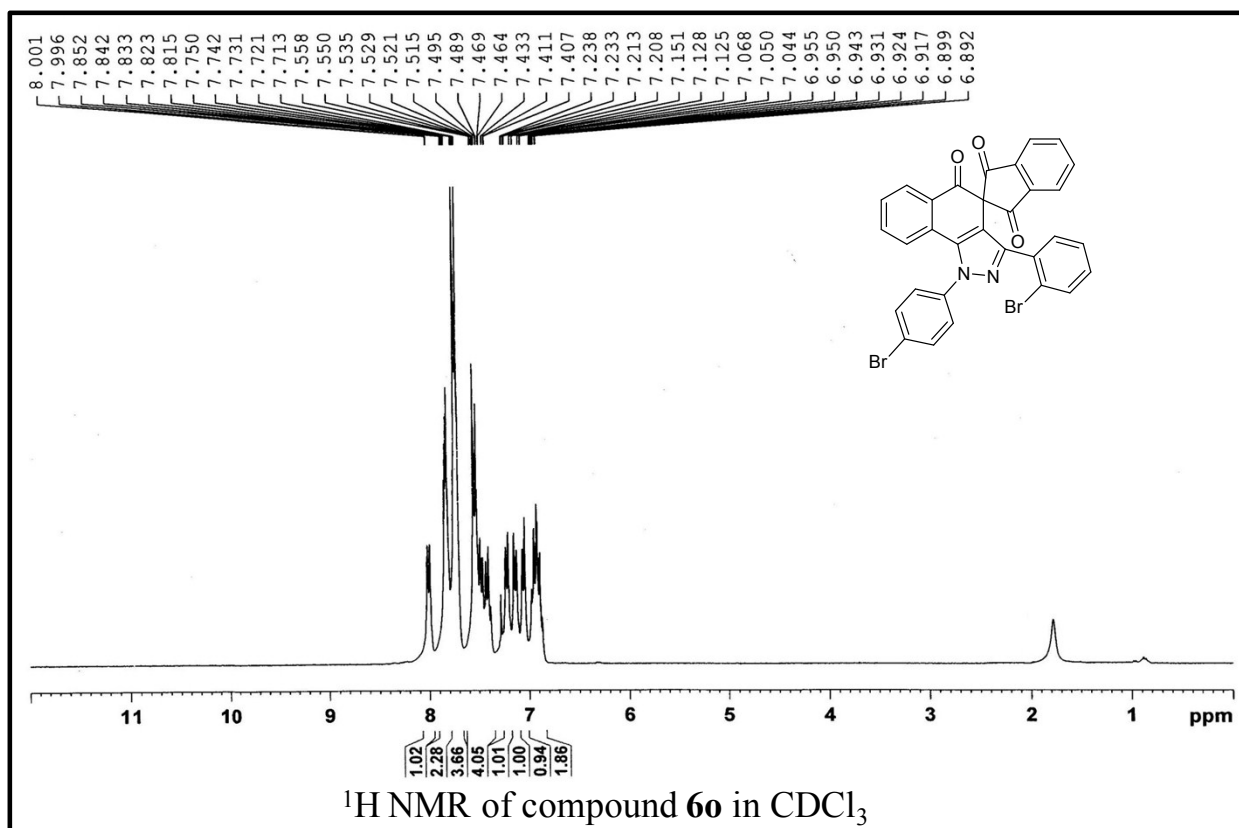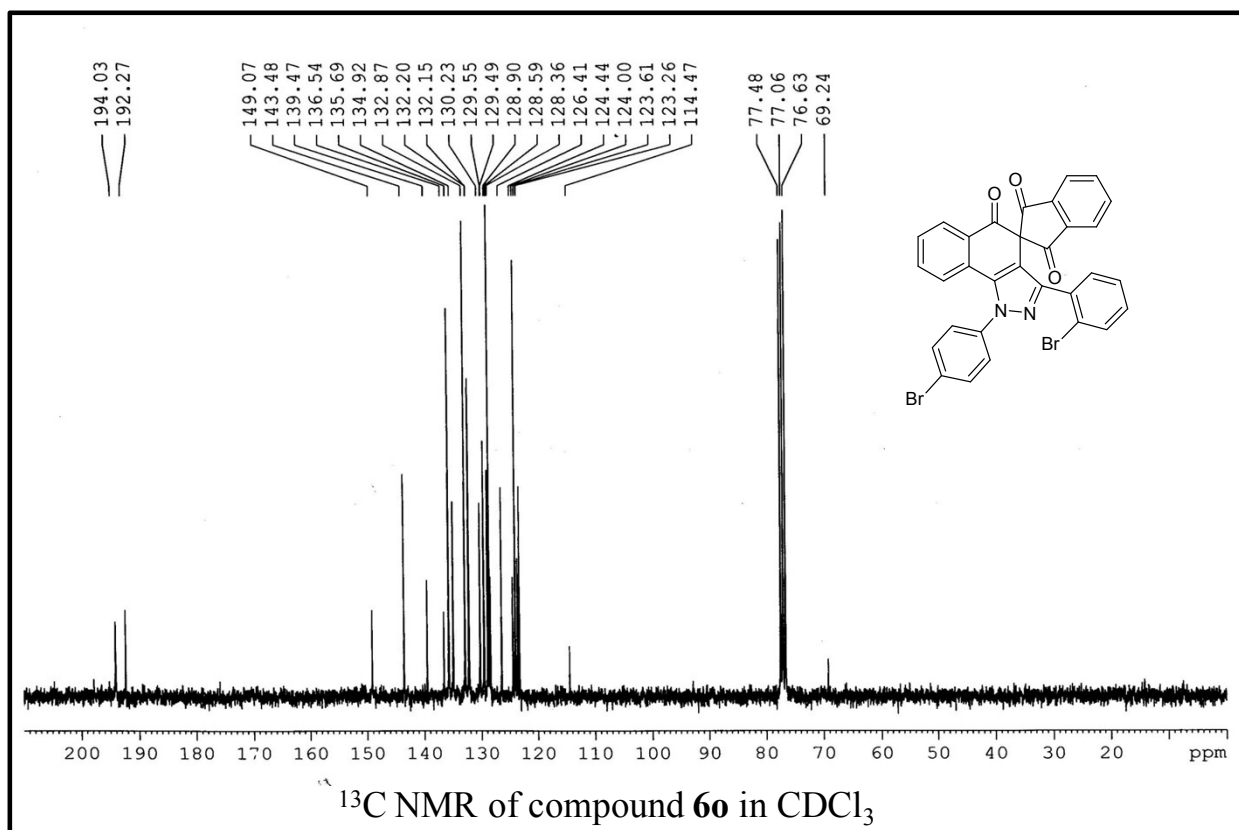



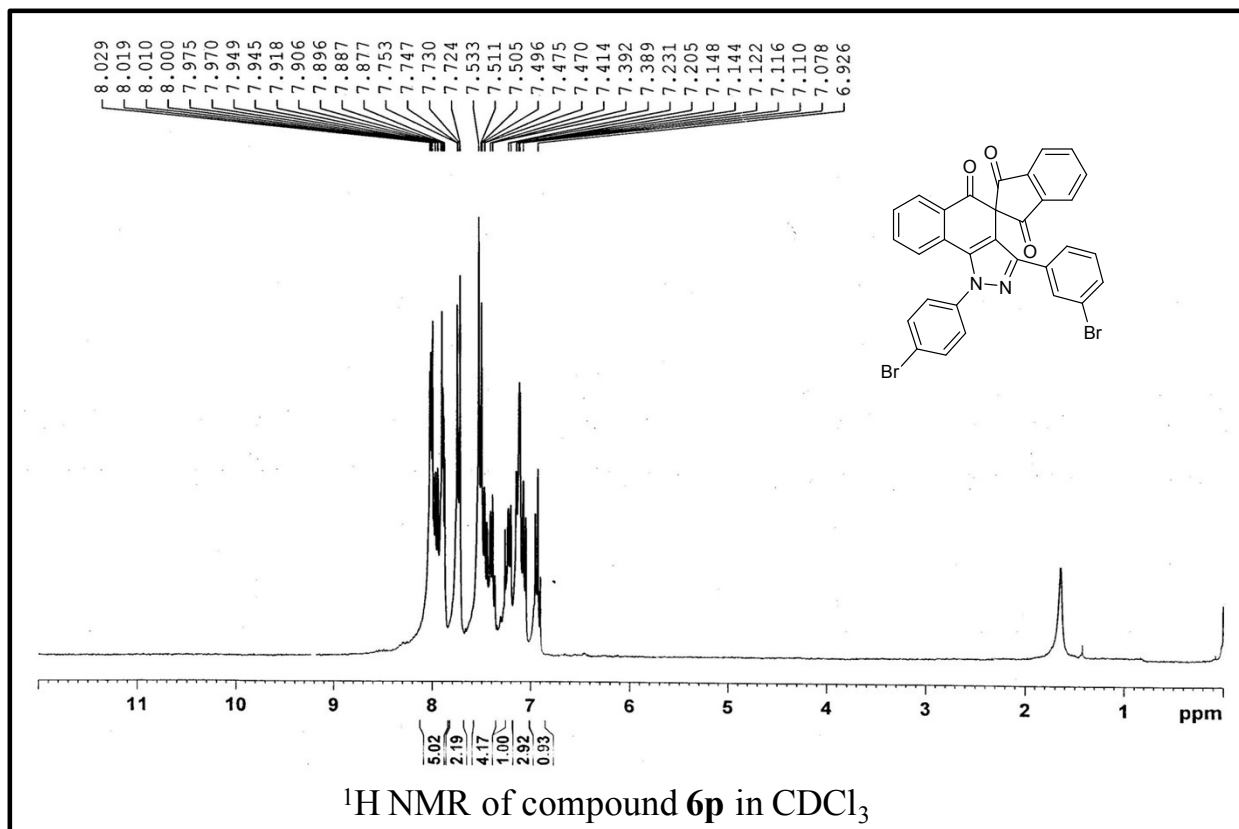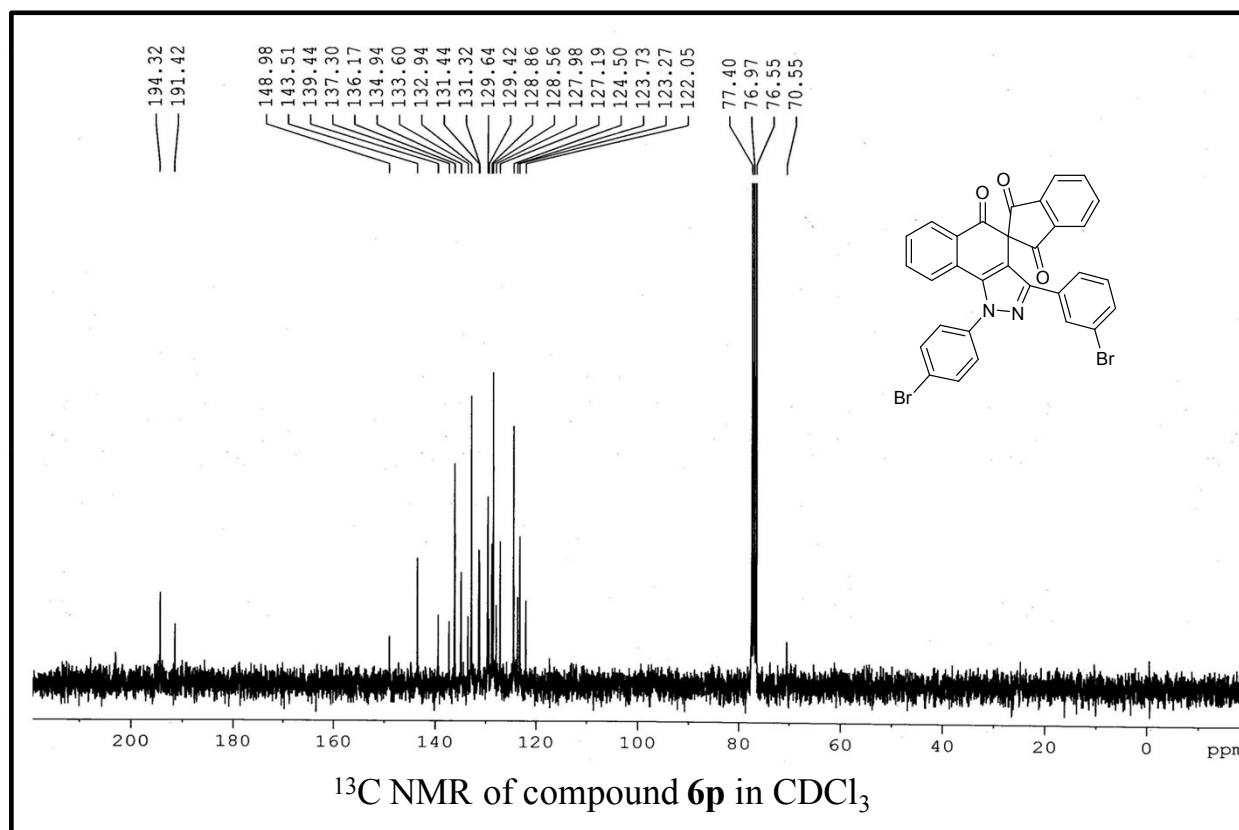

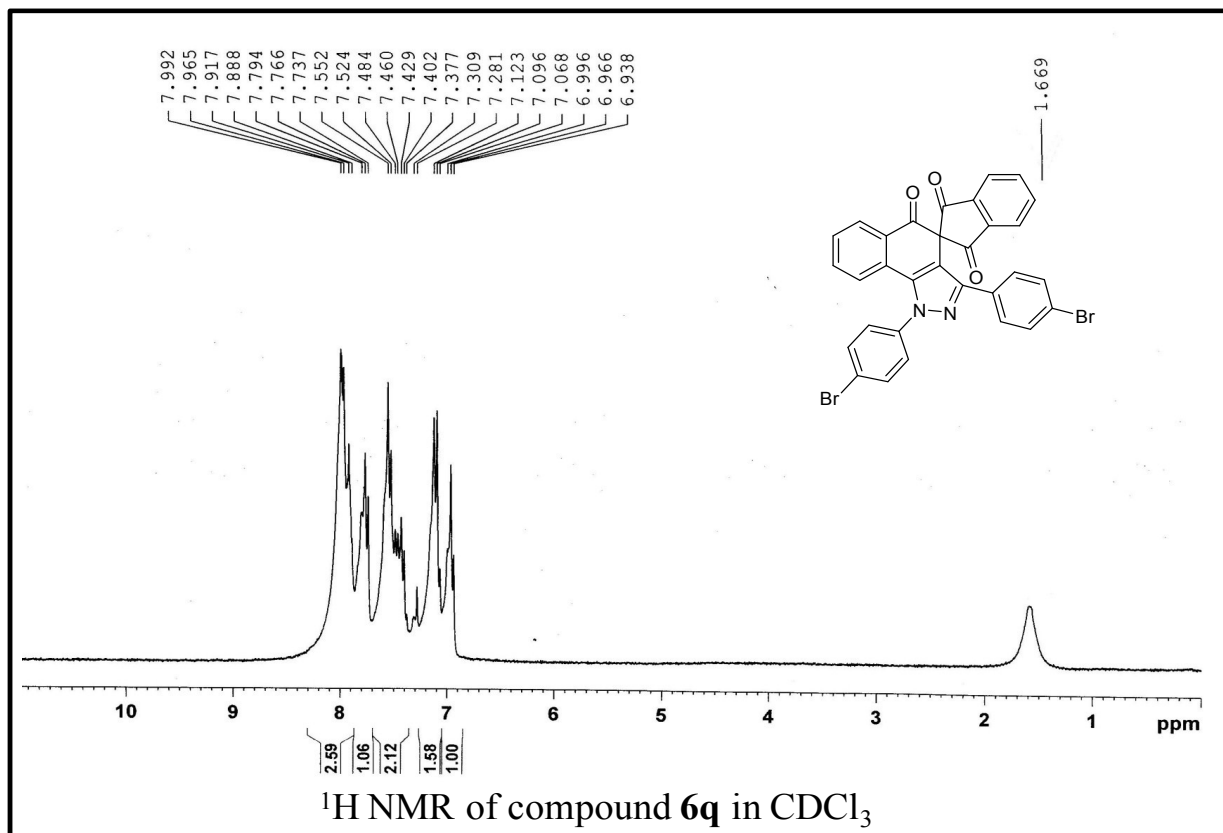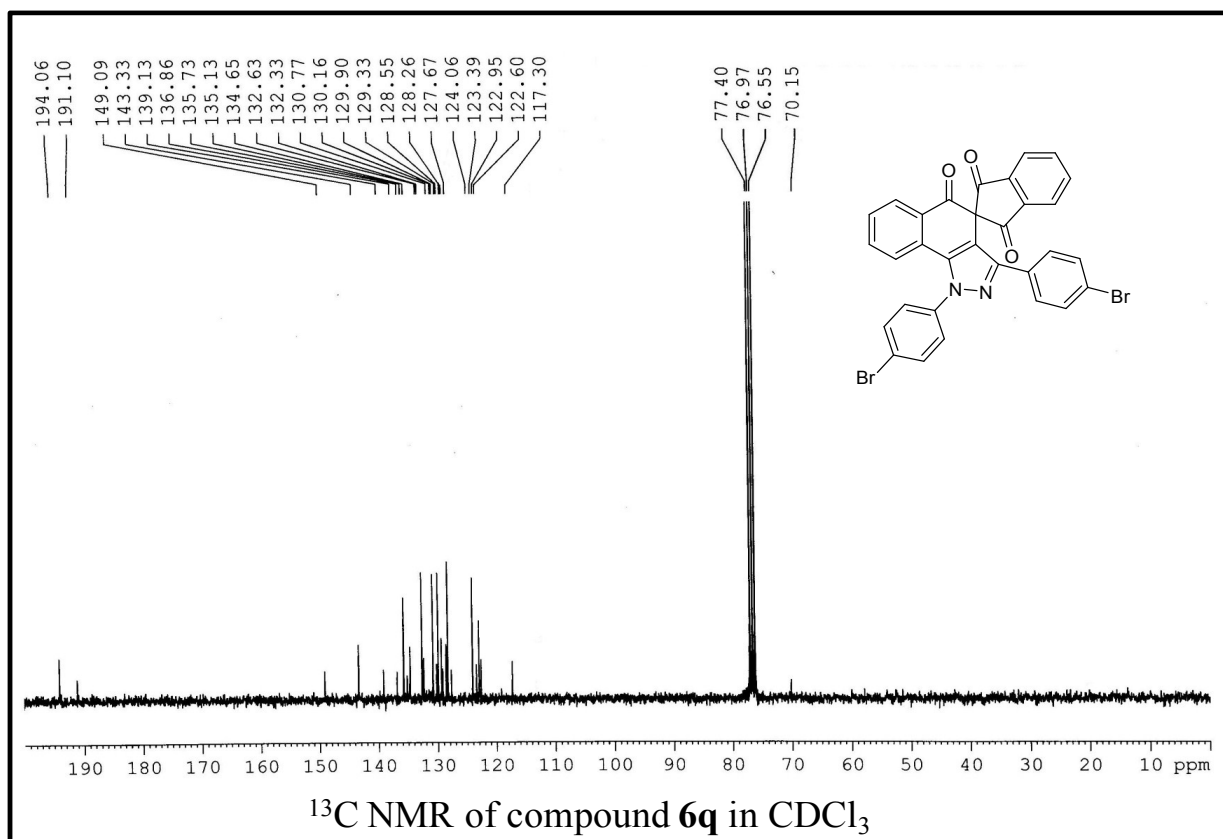

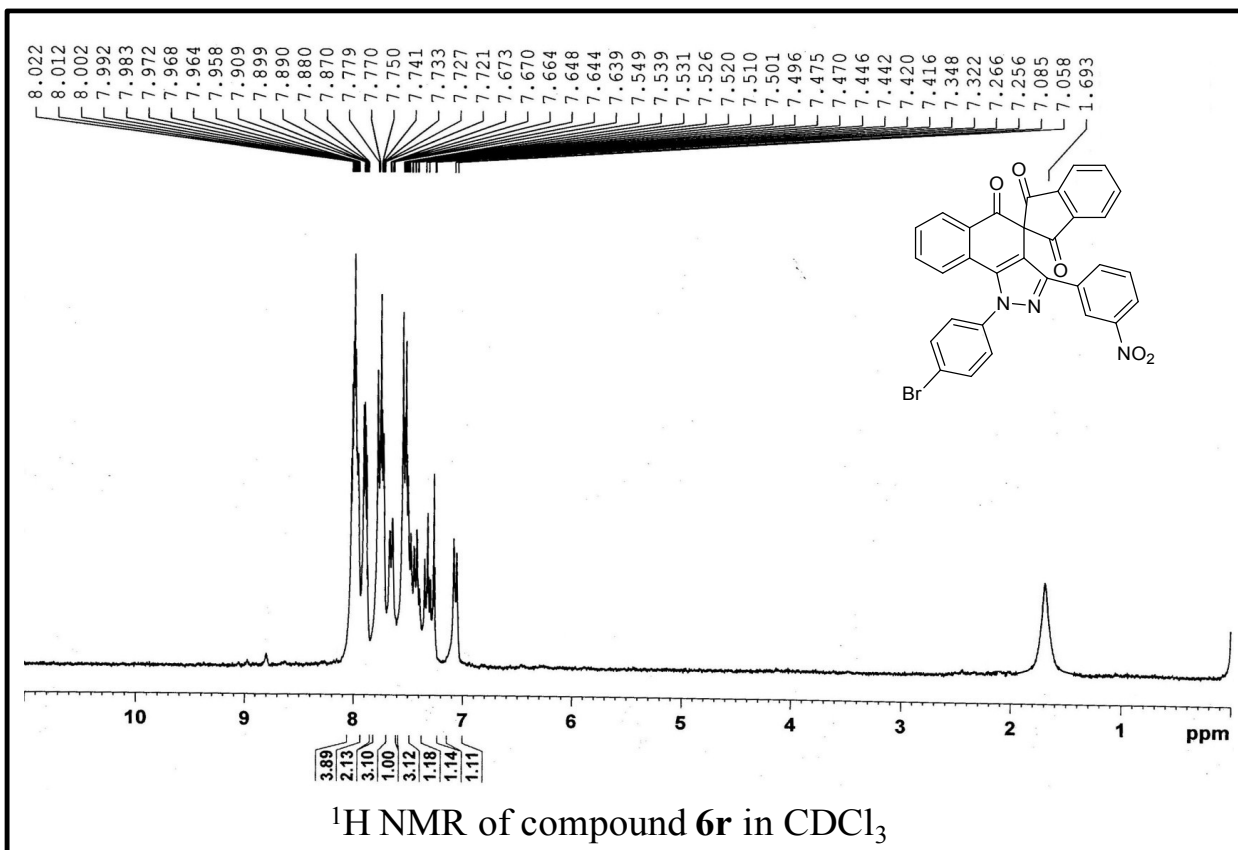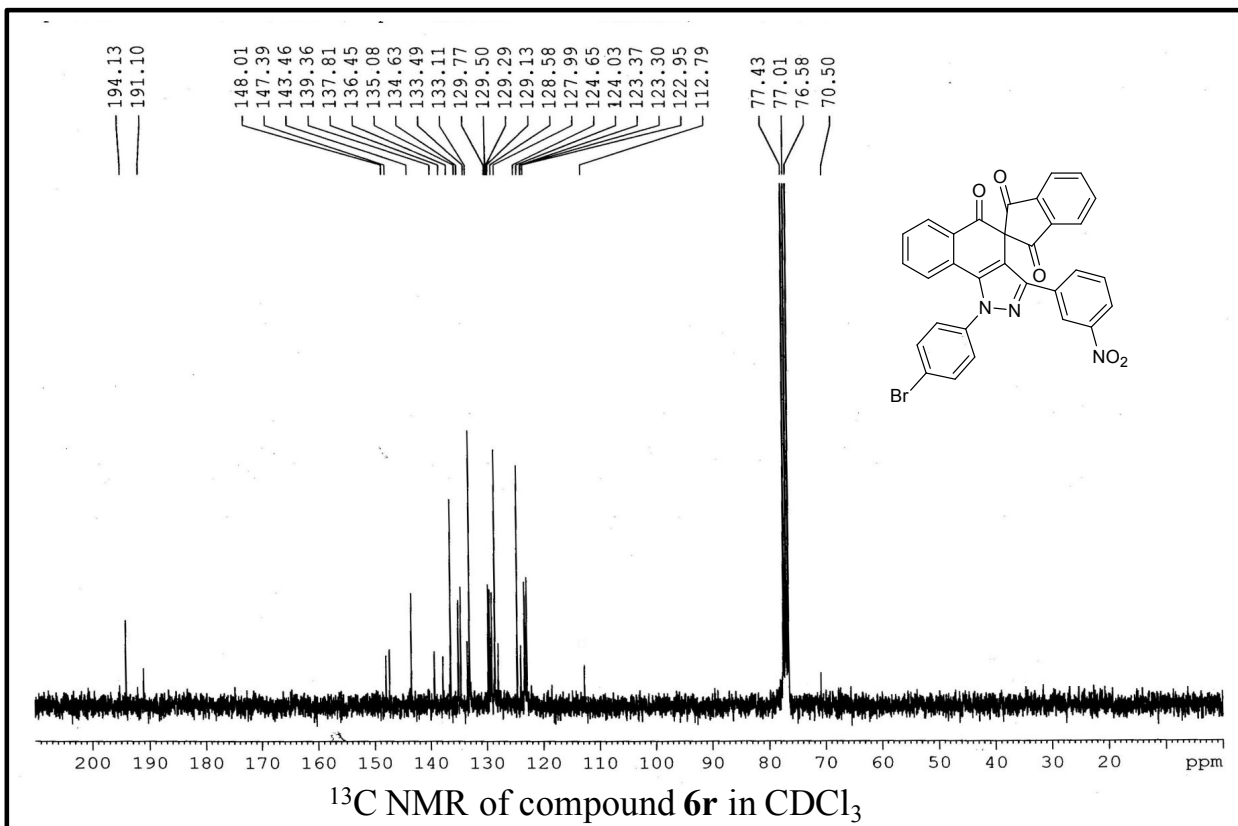

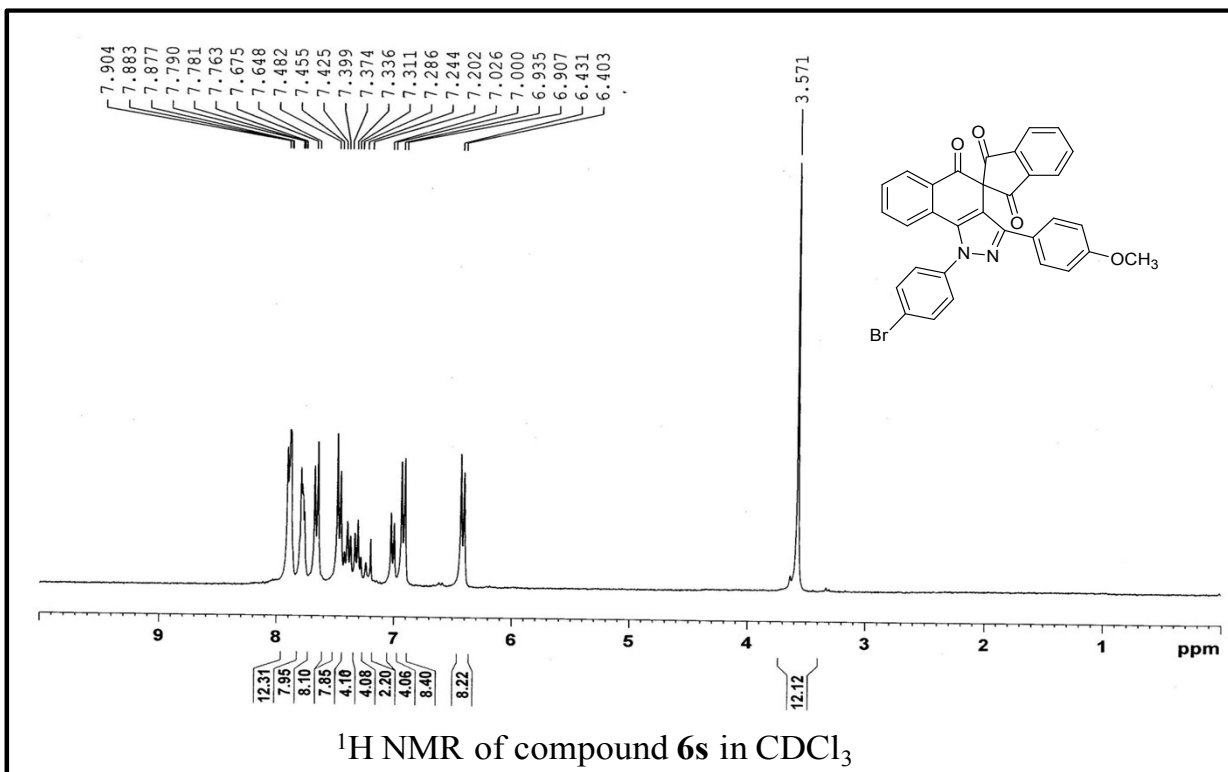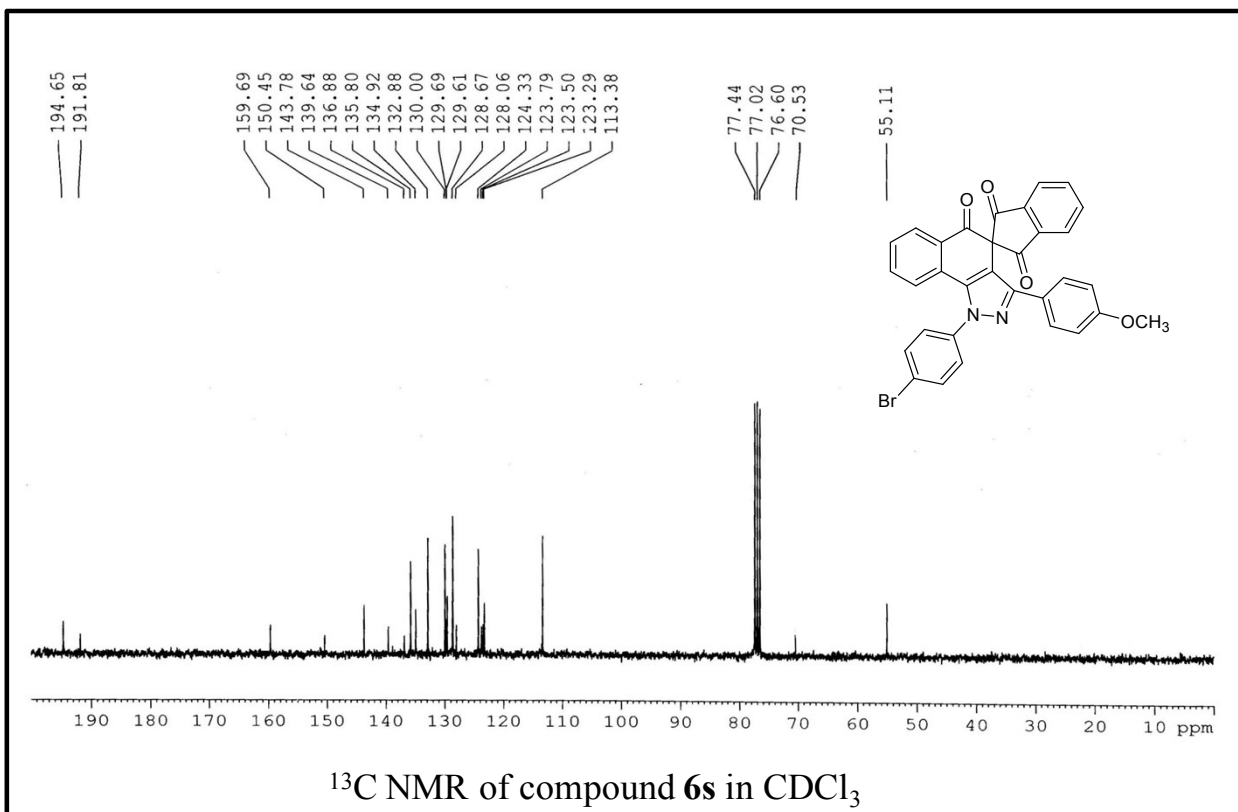

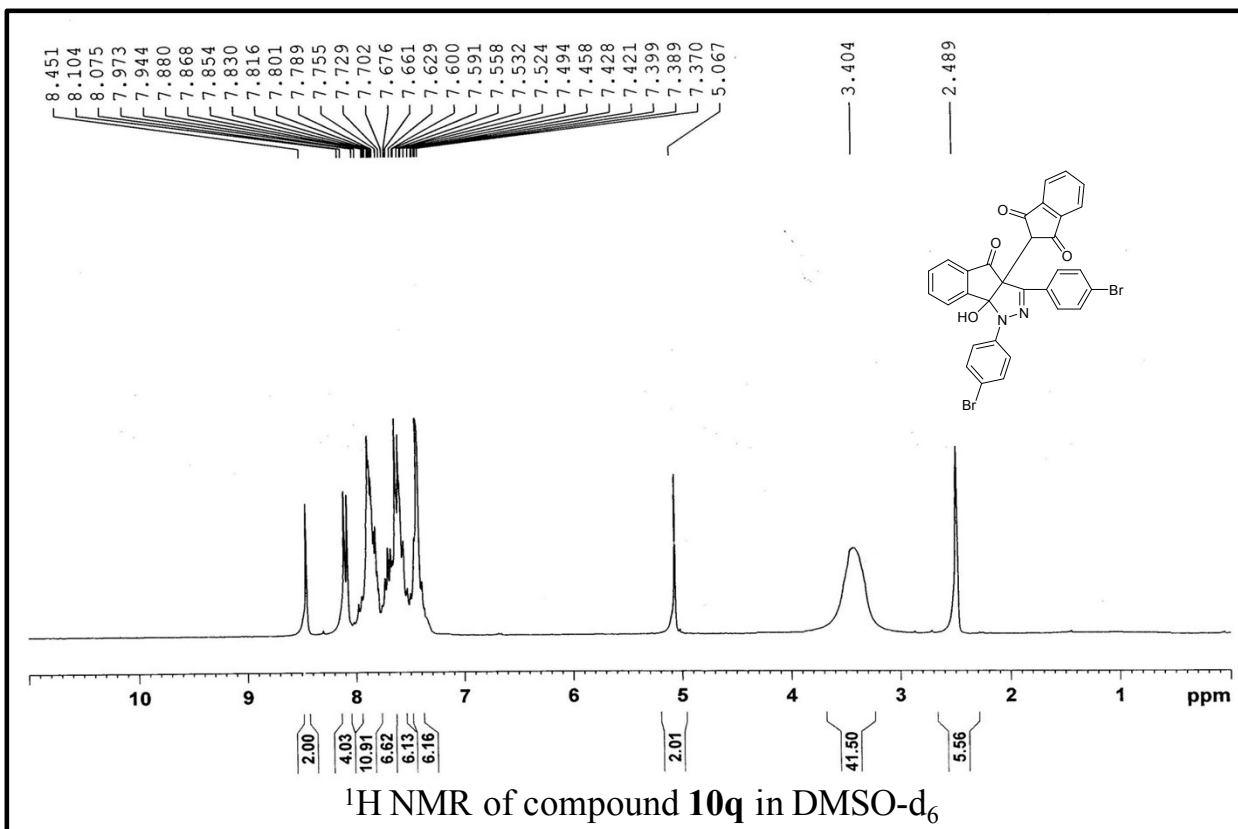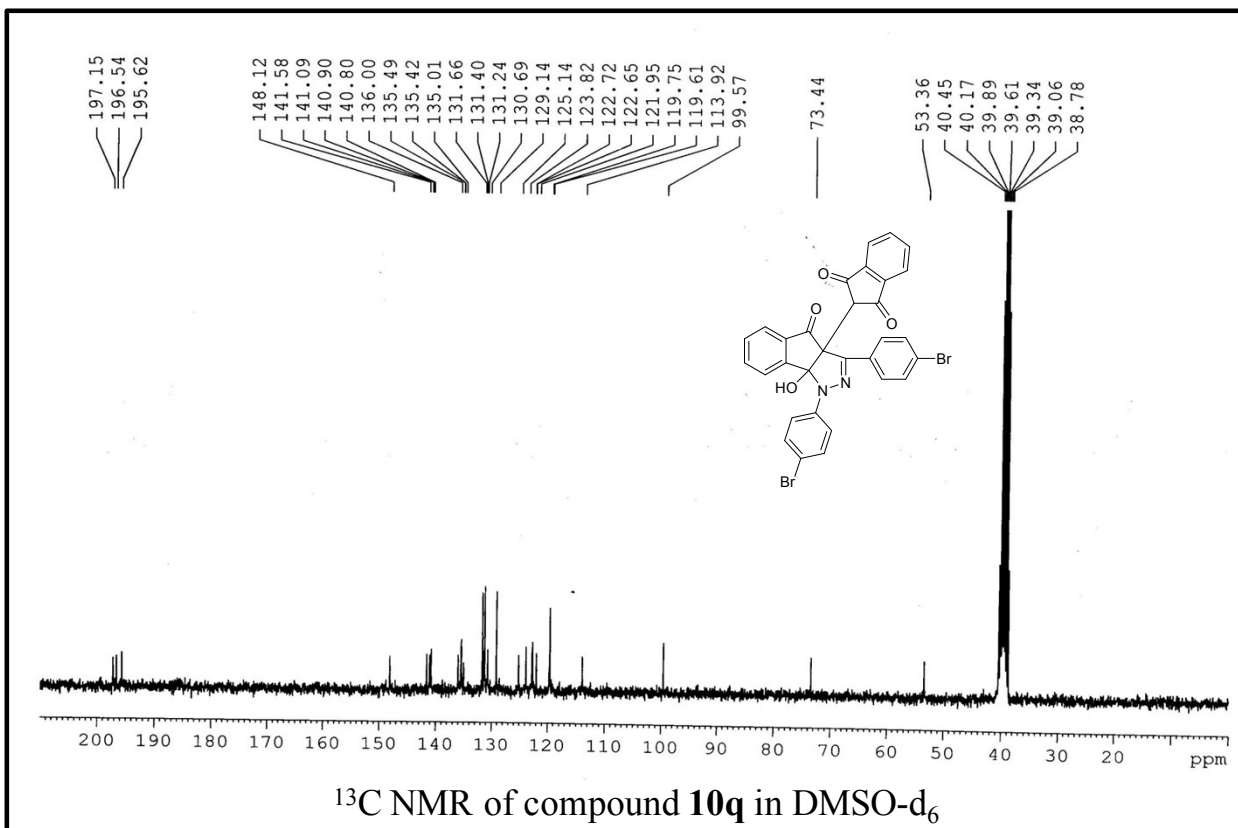

### **Infrared spectra:**

The infrared spectrum of fresh Fe<sub>3</sub>O<sub>4</sub>@SiO<sub>2</sub>-SO<sub>3</sub>H magnetic nanoparticles (MNPs) is shown in Fig. **S1(a)**. The Fe–O stretching vibration near 532 cm<sup>-1</sup> and O–H deformed vibration near 1622 cm<sup>-1</sup> are observed for the magnetic nanocomposites. The appearance of the peaks at 1091 and 1003 cm<sup>-1</sup> described to the stretching of the S–O bonds. And peak at about 3195 cm<sup>-1</sup> appeared due to the presence of -OH groups. All these observations confirm that the sulfonic groups have functionalized the surface of the MNPs.<sup>1,2</sup> The infrared spectra of reused catalyst after five runs is shown in Fig. **S1(b)**. It is important to note that all corresponding peaks are intact without any major change which indicates that structure of catalyst doesn't change even after 5 cycles.

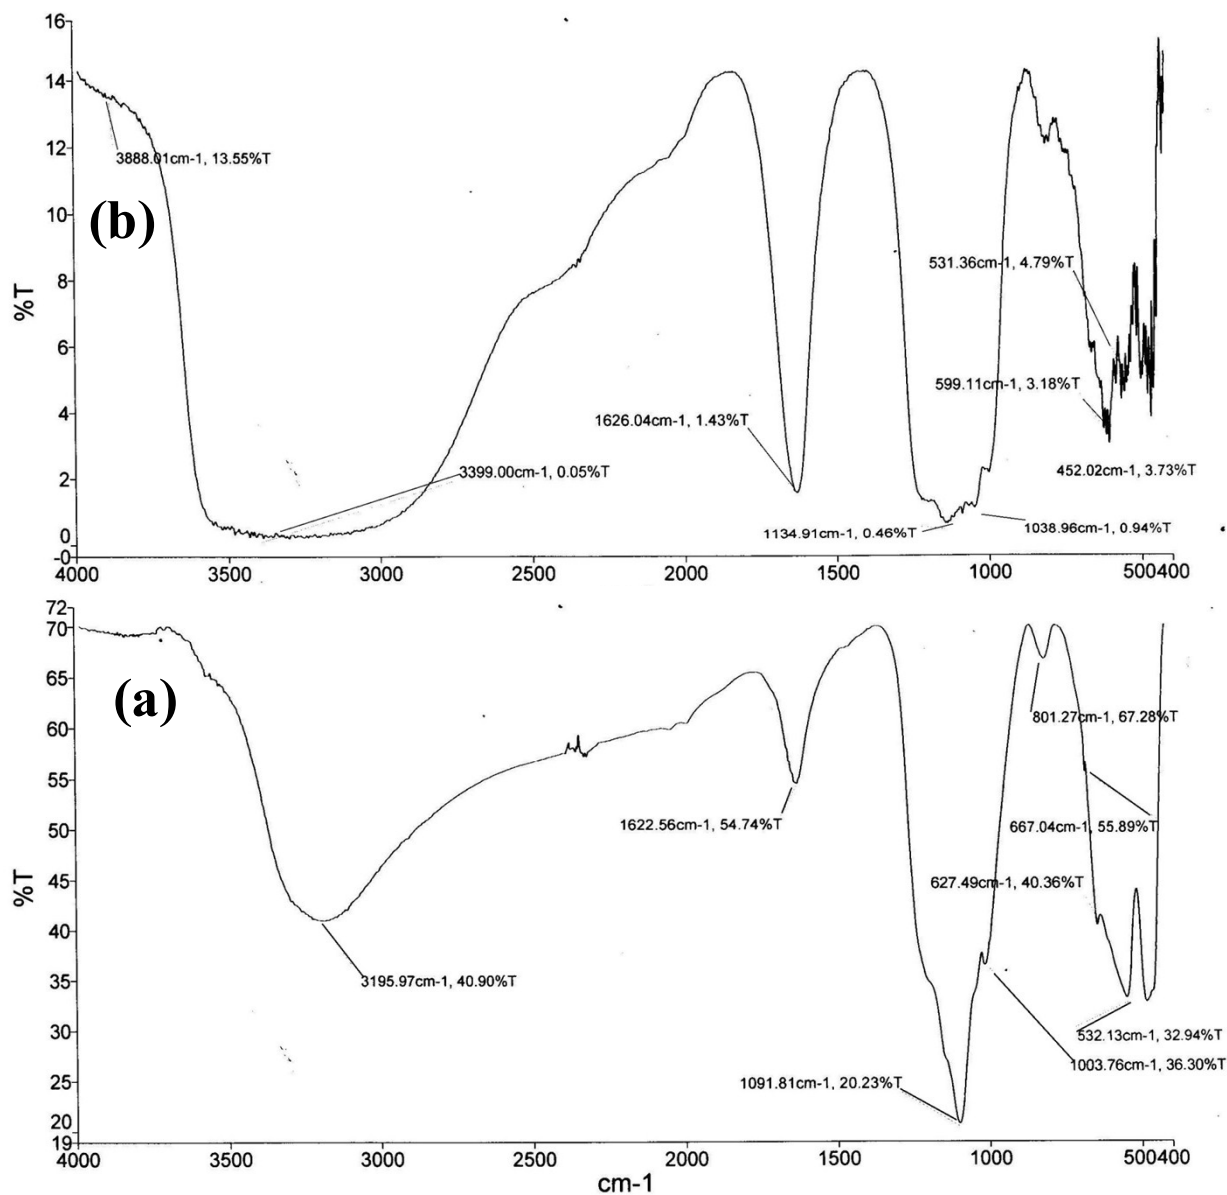

**Fig. S1** FT-IR spectra of (a) fresh  $\text{Fe}_3\text{O}_4@\text{SiO}_2\text{-SO}_3\text{H}$  MNPs and (b) reused  $\text{Fe}_3\text{O}_4@\text{SiO}_2\text{-SO}_3\text{H}$  MNPs after 5 th cycle.

## References:

- 1 J. Safari and Z. Zarnegar, *RSC Adv.*, 2015, **5**, 17738.
- 2 N. Koukabi, E. Kolvari, M. A. Zolfigol, A. Khazaei, B. S. Shaghasemi and B. Fasahati, *Adv. Synth. Catal.*, 2012, **354**, 2001.
